# Supplementary material for: Locating manganese vanadate phase with PO 4 3− -modified Mn 2+ –O–V 5+ motifs optimized for catalytic NO X and poison abatement under oxidative wet conditions
Source: Royal Society of Chemistry journal article supplement (doi:10.1039/d4ta03928a), 2024-01-01
Supplement: d4ta03928a1.pdf [file d4ta03928a1.pdf]

### **Supplementary information**

**Title:** Locating Manganese Vanadate Phase with  $\text{PO}_4^{3-}$ -Modified  $\text{Mn}^{2+}$ -O- $\text{V}^{5+}$  Motifs Optimized for Catalytic  $\text{NO}_x$  and Poison Abatement under Oxidative Wet Conditions

**Authors:** Seokhyun Lee,<sup>a</sup> So Hyeon Park,<sup>b</sup> and Jongsik Kim<sup>b,c,\*</sup>

\* corresponding author: jkim40@khu.ac.kr (J. Kim)

#### **Affiliations:**

<sup>a</sup> Ajou Energy Science Research Center, Ajou University, Suwon, 16499, South Korea.

<sup>b</sup> Department of Chemical Engineering (Integrated Engineering Program), Kyung Hee University, Yongin, 17104, South Korea.

<sup>c</sup> KHU-KIST Department of Converging Science and Technology, Kyung Hee University, Seoul, 02447, South Korea.

#### **Contents**

|                                   |         |
|-----------------------------------|---------|
| <b>Experimental section</b> ..... | S2-S4   |
| <b>Table S1-S12</b> .....         | S5-S16  |
| <b>Fig. S1-S16</b> .....          | S17-S32 |
| <b>References</b> .....           | S33     |

## Experimental section

### Catalysts

The catalysts were synthesized via impregnation-calcination techniques according to the protocols with minor modifications from those we reported earlier.<sup>1-8</sup> In the typical synthesis of TiO<sub>2</sub>-supported Mn<sub>x</sub>V<sub>2</sub>O<sub>x+5</sub> (X=1, 2, or 3; referred to as Mn<sub>x</sub>), 1.96 mmol of NH<sub>4</sub>VO<sub>3</sub> (Junsei; ≥99.0 %) dissolved in 140 mL de-ionized H<sub>2</sub>O was mixed with 'Z' mmol of Mn(NO<sub>3</sub>)<sub>2</sub>•XH<sub>2</sub>O (Sigma-Aldrich; 98.0 %) dissolved in 60 mL de-ionized H<sub>2</sub>O ('Z' of 0.98 mmol for Mn<sub>1</sub>; 1.96 mmol for Mn<sub>2</sub>; 2.94 mmol for Mn<sub>3</sub>), stirred at 25 °C for an hour, and further mixed with 'W' g of TiO<sub>2</sub> (DT51 (anatase); CristalACTiV™; 'W' g of 4.85 g for Mn<sub>1</sub>; 4.79 g for Mn<sub>2</sub>; 4.74 g for Mn<sub>3</sub>) prior to being stirred at 25 °C for 18 hours.<sup>1-6</sup> The resulting synthetic mixture was then subjected to rotary evaporation for the removal of H<sub>2</sub>O, dried overnight at 110 °C, and calcined at 500 °C for 5 hours with the ramping rate of 5 °C min<sup>-1</sup>.<sup>1-6</sup> In the typical synthesis of TiO<sub>2</sub>-supported Sb<sub>2</sub>O<sub>5</sub> (referred to as Sb<sub>2</sub>O<sub>5</sub>/TiO<sub>2</sub>), 7.39 mmol of Sb(CH<sub>3</sub>COO)<sub>3</sub> (Alfa Aesar; 97.0 %) was dissolved in 250 mL of CH<sub>3</sub>COOH (J. T. Baker; ≥97.0 %), mixed with 29.1 g of DT51, stirred at 25 °C for 18 hours, subjected to rotary evaporation for the removal of CH<sub>3</sub>COOH, dried overnight at 110 °C, and calcined at 500 °C for 5 hours with the ramping rate of 5 °C min<sup>-1</sup>.<sup>1-6</sup> In the typical synthesis of Sb<sub>2</sub>O<sub>5</sub>-promoted Mn<sub>1</sub> (referred to as Mn<sub>1</sub>-Sb), its procedures were identical to those used to synthesize Mn<sub>1</sub> except for the substitution of 4.85 g of Sb<sub>2</sub>O<sub>5</sub>/TiO<sub>2</sub> for 4.85 g of TiO<sub>2</sub>.<sup>1-6</sup> In the typical synthesis of Mn<sub>x</sub> (or Mn<sub>1</sub>-Sb) modified with (protonated) PO<sub>4</sub><sup>3-</sup> functionalities (referred to as Mn<sub>x</sub>-P (or Mn<sub>1</sub>-Sb-P)), 0.44 mmol of (NH<sub>4</sub>)<sub>2</sub>HPO<sub>4</sub> (Daejung; ≥98.5 %) was dissolved in 250 mL de-ionized H<sub>2</sub>O, mixed with 3 g of Mn<sub>x</sub> (or Mn<sub>1</sub>-Sb), stirred at 25 °C for 18 hours, subjected to rotary evaporation for the removal of H<sub>2</sub>O, dried overnight at 110 °C, and calcined at 500 °C for an hour with the ramping rate of 10 °C min<sup>-1</sup>.<sup>7, 8</sup> In the typical synthesis of Mn<sub>1</sub>-Sb modified with (protonated) SO<sub>4</sub><sup>2-</sup> (A=3-4) functionalities (referred to as Mn<sub>1</sub>-Sb-S), Mn<sub>1</sub>-Sb was exposed to a N<sub>2</sub>-balanced gas including 500 ppm SO<sub>2</sub> and 3 vol. % O<sub>2</sub>/N<sub>2</sub> at 500 °C for an hour with the ramping rate of 10 °C min<sup>-1</sup> and the flow rate of 500 mL min<sup>-1</sup>.<sup>1, 2</sup> A commercial control of WO<sub>3</sub>-promoted V<sub>2</sub>O<sub>5</sub> on TiO<sub>2</sub> (referred to as V<sub>2</sub>O<sub>5</sub>-WO<sub>3</sub>) was synthesized according to the protocols we reported elsewhere.<sup>1-6</sup> Mn<sub>1</sub>-Sb-S and V<sub>2</sub>O<sub>5</sub>-WO<sub>3</sub> were utilized for comparison with Mn<sub>1</sub>-Sb-P.

### Characterizations

A NOVA 2200e (Quantachrome Instruments) served to collect N<sub>2</sub> adsorption-desorption isotherms of the catalysts at -196 °C after their surfaces were purged under vacuum (1.0X10<sup>-3</sup> mmHg) at 150 °C for 3 hours. The volumes of N<sub>2</sub> adsorbed in a-per gram of the catalysts at partial pressure regimes (P/P<sub>0</sub>) of 0.05-0.30 were considered to evaluate their N<sub>2</sub>-accessible Brunauer-Emmett-Teller (BET) surface areas (S<sub>BET, N2</sub>) and Barrett-Joyner-Halenda (BJH) pore volumes (V<sub>BJH, N2</sub>) at -196 °C. A BELSORP-MAX (MicrotracBEL Corp.) served to collect H<sub>2</sub>O adsorption isotherms of the catalysts at 10-40 °C after their surfaces were purged under vacuum (1.0X10<sup>-3</sup> mmHg) at 150 °C for 3 hours.<sup>4, 6, 9-13</sup> The amounts of H<sub>2</sub>O adsorbed in a-per gram of the catalysts (N<sub>H2O</sub>) at partial pressure regimes (P/P<sub>0</sub>) of 0.05-0.30 were considered to assess their H<sub>2</sub>O-accessible BET surface areas (S<sub>BET, H2O</sub>) at 10-40 °C.<sup>4, 6, 9-13</sup> Moreover, H<sub>2</sub>O adsorption isotherms were simulated via Toth fitting (Eqn. S1), in which δ is referred to as the maximum number of H<sub>2</sub>O adsorbed in a per-gram of the catalyst (mol<sub>H2O</sub> g<sub>CAT</sub><sup>-1</sup>), whereas ε, ζ, and P are referred to as the constant indigenous to the catalyst (bar<sup>-1</sup>), the constant concerning heterogeneous feature of the catalyst surface (dimensionless), and the pressure (bar), respectively.<sup>4, 6, 9-13</sup> Isothermic heats of H<sub>2</sub>O adsorption on the catalyst surfaces at near-zero H<sub>2</sub>O coverages (E<sub>H2O</sub>) were then evaluated with the use of Clausius-Clapeyron equation (Eqn. S2), in which P<sub>1</sub>/P<sub>2</sub> and R are referred to as the pressures (bar) at the temperatures of T<sub>1</sub>/T<sub>2</sub> (K) and the ideal gas constant (8.3145 J mol<sup>-1</sup> K<sup>-1</sup>), respectively.<sup>4, 6, 9-13</sup>

$$N_{H2O} = \delta \times \frac{\varepsilon \times P}{(1 + (\varepsilon \times P)^\zeta)^{\frac{1}{\delta}}} \quad (S1)$$

$$\ln\left(\frac{P_1}{P_2}\right) = \frac{E_{H2O}}{R} \times \left(\frac{T_1 - T_2}{T_1 \times T_2}\right) \quad (S2)$$

An ICS 3000 (Thermo Fisher Scientific) served to carry out inductively coupled plasma-optical emission spectroscopy (ICP-OES) and inductively coupled plasma-atomic absorption spectroscopy (ICP-AAS) experiments of the catalysts. An Ultim max 170 (Oxford) served to collect energy-dispersive X-ray spectroscopy (EDX) mapping images of the catalysts at the acceleration voltage of 15 keV after their surfaces were purged under vacuum (1.0X10<sup>-6</sup> mmHg). A Titan 80-300™ (FEI) served to collect high-resolution transmission electron microscopy (HRTEM) images and selected area electron diffraction (SAED) patterns of the catalysts at the acceleration voltage of 300 keV after their surfaces were purged at 25 °C under vacuum (2.0X10<sup>-7</sup> mmHg). A D8 Advance diffractometer (Bruker) served to collect X-ray diffraction (XRD) patterns of the catalysts under analytic

conditions of the  $2\theta$  range, the step size, and the scan speed of  $20^\circ$ - $80^\circ$ ,  $0.02^\circ$  per step, and 2 seconds per step, respectively, with the use of Cu  $K\alpha$  radiation ( $\lambda = 1.54 \text{ \AA}$ ). A PHI 5000 VersaProbe (Ulvac-Phi) served to collect X-ray photoelectron (XP) spectra of the catalysts and their surface atomic concentrations after the catalyst surfaces were purged at  $25^\circ \text{C}$  under vacuum ( $1.5 \times 10^{-10} \text{ mmHg}$ ). The XP spectra provided the resolution of 0.1 eV and were de-convoluted using Gaussian functions.<sup>1-8, 14</sup> A Varian 400 MHz solid NMR spectrometer (Agilent Technologies) coupled with a 4.0 mm NB probe served to collect  $^{31}\text{P}$  magic angle spinning (MAS) nuclear magnetic resonance (NMR) spectra of the catalysts with the channel of a 4.0 mm NB probe being dialed in to 161.97 MHz at the temperature and the magnetic field of  $25^\circ \text{C}$  and 9.39 T, respectively.<sup>7, 8, 10</sup> The  $^{31}\text{P}$  MAS NMR spectra of the catalysts loaded in a  $\text{ZrO}_2$  rotor with the outer radius of 4.0 mm were collected under analytic conditions of the  $\pi/2$  signal duration, the acquisition time, the total scan number, the spinning rate, and the recycle delay of 4.0  $\mu\text{second}$ , 0.02 second, 10,000, 10.0 kHz, and 0.2  $\mu\text{second}$ , respectively.<sup>7, 8, 10</sup> The  $^{31}\text{P}$  MAS NMR spectra were de-convoluted using Gaussian functions.<sup>7, 8, 10</sup> An FT/IR-6X (Jasco) equipped with ZnSe optics and a mercury-cadmium-telluride detector served to monitor background-subtracted, *in situ* diffuse reflectance infrared Fourier transform (DRIFT) spectra for the catalysts with their surfaces being purged under 3 vol. %  $\text{O}_2/\text{N}_2$  at  $300^\circ \text{C}$  for 30 minutes and exposed to a  $\text{N}_2$ -balanced feed gas containing 1,000 ppm  $\text{NH}_3$  or 1,000 ppm  $\text{NO}/3.0 \text{ vol. \% O}_2$  at  $220^\circ \text{C}$  for 30 minutes (Fig. 5).<sup>1-8, 14</sup> A BELCAT-B (BEL Japan, Inc.) served to collect the profiles of  $\text{CO}$ -pulsed chemisorption (thermal conductivity detector (TCD) signal *versus* time),  $\text{O}_2$ -pulsed chemisorption (thermal conductivity detector (TCD) signal *versus* time),  $\text{H}_2$ -temperature-programmed reduction ( $\text{H}_2$ -TPR; thermal conductivity detector (TCD) signal *versus* temperature),  $\text{NH}_3$ -temperature-programmed desorption ( $\text{NH}_3$ -TPD; thermal conductivity detector (TCD) signal *versus* temperature), and  $\text{O}_2$ -temperature-programmed desorption ( $\text{O}_2$ -TPD; thermal conductivity detector (TCD) signal *versus* temperature) for the catalysts.  $\text{CO}$ -pulsed chemisorption experiments were conducted by letting the catalyst surfaces be purged under 10 vol. %  $\text{O}_2/\text{He}$  at  $300^\circ \text{C}$  for an hour, cooled to  $50^\circ \text{C}$  under a He, and subjected to periodic  $\text{CO}$  injection at  $50^\circ \text{C}$  until the  $\text{CO}$  pulse-induced change in thermal conductivity detector (TCD) signals was minute.<sup>1-8, 14</sup>  $\text{O}_2$ -pulsed chemisorption experiments were performed by letting the catalyst surfaces be purged under 10 vol. %  $\text{O}_2/\text{He}$  at  $300^\circ \text{C}$  for an hour, cooled to  $50^\circ \text{C}$  under a He, reduced under 10 vol. %  $\text{H}_2/\text{He}$  at  $300^\circ \text{C}$  for an hour with the ramping rate of  $10^\circ \text{C min}^{-1}$ , cooled to  $250^\circ \text{C}$  under a He, and subjected to periodic  $\text{O}_2$  injection at  $250^\circ \text{C}$  until the  $\text{O}_2$  pulse-induced change in thermal conductivity detector (TCD) signals was minute.<sup>3-6</sup>  $\text{H}_2$ -TPR experiments were carried out by letting the catalyst surfaces be purged under an Ar at  $300^\circ \text{C}$  for an hour, cooled to  $50^\circ \text{C}$  under an Ar, and heated to  $800^\circ \text{C}$  under 10 vol. %  $\text{H}_2/\text{Ar}$  with the ramping rate of  $10^\circ \text{C min}^{-1}$ .  $\text{NH}_3$ -TPD experiments were conducted by letting the catalyst surfaces be purged under 10 vol. %  $\text{O}_2/\text{He}$  at  $300^\circ \text{C}$  for an hour, cooled to  $50^\circ \text{C}$  (or  $220^\circ \text{C}$ ) under a He, and exposed to 5 vol. %  $\text{NH}_3/\text{He}$  at  $50^\circ \text{C}$  (or  $220^\circ \text{C}$ ) for an hour to saturate the surfaces with  $\text{NH}_3$ .<sup>1-8, 14</sup> The surfaces were then exposed to a He at  $50^\circ \text{C}$  (or  $220^\circ \text{C}$ ) for an hour to remove physisorbed  $\text{NH}_3$  molecules and heated to  $700^\circ \text{C}$  under a He with the ramping rates ( $\beta$ ) of 10 (for  $\text{NH}_3$  chemisorption at  $50^\circ \text{C}$ ) or  $10$ - $30^\circ \text{C min}^{-1}$  (for  $\text{NH}_3$  chemisorption at  $220^\circ \text{C}$ ).<sup>1-8, 14</sup> The resulting  $\text{NH}_3$ -TPD profile at a  $\beta$  value was then de-convoluted using Gaussian functions to provide three sub-bands (I-III), each of which possessed the temperature with the maximum intensity of TCD signal ( $T_{\text{MAX}}$ ).<sup>1-8, 14</sup> Eqn. S3 then served to evaluate the energy required to release  $\text{NH}_3$  molecules from the catalyst surface ( $E_{\text{NH}_3}$ ) at  $220^\circ \text{C}$  via TPD theory.<sup>1-8</sup> In Eqn. S3,  $\theta_{\text{MAX}}$  and  $v_n/n$  correspond to the surface coverage of  $\text{NH}_3$  at  $T_{\text{MAX}}$  and the lumped constants indigenous to the surface, respectively.<sup>1-8, 14</sup>

$$\ln\left(\frac{\beta}{T_{\text{MAX}}^2}\right) = -\left(\frac{E_{\text{NH}_3}}{R}\right)\left(\frac{1}{T_{\text{MAX}}}\right) - \underbrace{2.303 \times \log\left(\frac{E_{\text{NH}_3}}{v_n R n \theta_{\text{MAX}}^{n-1}}\right)}_{\text{CONSTANT}} \quad (\text{S3})$$

$\text{O}_2$ -TPD experiments were conducted by letting the catalyst surfaces be purged under 10 vol. %  $\text{O}_2/\text{He}$  at  $300^\circ \text{C}$  for an hour, cooled to  $50^\circ \text{C}$  under a He, and reduced using 10 vol. %  $\text{H}_2/\text{He}$  at  $300^\circ \text{C}$  for an hour with the ramping rate of  $10^\circ \text{C min}^{-1}$ .<sup>3-6</sup> The surfaces were then cooled to  $50^\circ \text{C}$  under a He, exposed to 3 vol. %  $\text{O}_2/\text{He}$  at  $50^\circ \text{C}$  for an hour, exposed to a He at  $50^\circ \text{C}$  for an hour to remove physisorbed  $\text{O}_2$  molecules, and heated to  $700^\circ \text{C}$  under a He with the  $\beta$  values of  $10$ - $30^\circ \text{C min}^{-1}$ .<sup>3-6</sup> The resulting  $\text{O}_2$ -TPD profile at a  $\beta$  value was then de-convoluted using Gaussian functions to provide three sub-bands (I-III), each of which possessed the temperature with the maximum intensity of TCD signal ( $T_{\text{MAX}}$ ).<sup>3-6</sup> Eqn. S4 then served to evaluate the energy required to release mobile oxygens ( $\text{O}_\text{M}$ ) from the catalyst surface ( $E_{\text{O}_\text{M}}$ ) at  $50^\circ \text{C}$  via TPD theory. In Eqn. S4,  $\theta_{\text{MAX}}$  and  $v_n/n$  correspond to the surface coverage of  $\text{O}_2$  at  $T_{\text{MAX}}$  and the lumped constants indigenous to the surface, respectively.<sup>3-6</sup>

$$\ln\left(\frac{\beta}{T_{\text{MAX}}^2}\right) = -\left(\frac{E_{\text{O}_\text{M}}}{R}\right)\left(\frac{1}{T_{\text{MAX}}}\right) - \underbrace{2.303 \times \log\left(\frac{E_{\text{O}_\text{M}}}{v_n R n \theta_{\text{MAX}}^{n-1}}\right)}_{\text{CONSTANT}} \quad (\text{S4})$$

A quartz reactor equipped with a SO<sub>2</sub> analyzer (Fuji Electric Co., ZKJ-2) served to collect the profiles of SO<sub>2</sub>-TPD (SO<sub>2</sub> concentration (C<sub>SO2</sub>) versus temperature) for the catalysts by letting the catalyst surfaces be purged under 3 vol. % O<sub>2</sub>/N<sub>2</sub> at 300 °C for an hour, cooled to 220 °C under a N<sub>2</sub>, and exposed to 5,000 ppm SO<sub>2</sub>/N<sub>2</sub> at 220 °C for an hour to saturate the surfaces with SO<sub>2</sub> molecules.<sup>3-6</sup> The surfaces were then exposed to a N<sub>2</sub> at 220 °C for an hour to remove physisorbed SO<sub>2</sub> molecules and heated to 900 °C under a N<sub>2</sub> with β values of 10-20 °C min<sup>-1</sup>.<sup>3-6</sup> The resulting SO<sub>2</sub>-TPD profile at a β value was then de-convoluted using Gaussian functions to provide five sub-bands (I-V), each of which possessed the temperature with the maximum intensity of C<sub>SO2</sub> (T<sub>MAX</sub>).<sup>3-6</sup> Eqn. S5 then served to evaluate the energy required to release SO<sub>2</sub> molecules from the catalyst surface (E<sub>SO2</sub>) at 220 °C via TPD theory.<sup>3-6</sup> In Eqn. S5, θ<sub>MAX</sub> and v<sub>n</sub>/n correspond to the surface coverage of SO<sub>2</sub> at T<sub>MAX</sub> and the lumped constants indigenous to the surface, respectively.<sup>3-6</sup>

$$\ln\left(\frac{\beta}{T_{MAX}^2}\right) = -\left(\frac{E_{SO2}}{R}\right)\left(\frac{1}{T_{MAX}}\right) - \underbrace{2.303 \times \log\left(\frac{E_{SO2}}{v_n R n \theta_{MAX}^{n-1}}\right)}_{CONSTANT} \quad (S5)$$

A thermo-gravimetric analyzer (TGA, Mettler Toledo, TGA 2) connected to a mass spectrometer (MASS, Hiden Analytical, HPR20) served to collect the profiles of weight percent (W; wt. %) loss versus temperature and SO<sub>2</sub> signal (m/z~64) released versus temperature for the catalysts poisoned with ammonium sulfate (AS) and ammonium bisulfate (ABS).<sup>1, 2, 4-6</sup> Typically, the AS/ABS-poisoned catalyst was loaded in an Al<sub>2</sub>O<sub>3</sub> pans, purged under an Ar at 100 °C for an hour to remove physisorbed H<sub>2</sub>O molecules, and heated to 600 °C under an Ar with the ramping rate of 5 °C min<sup>-1</sup> and the flow rate of 50 mL min<sup>-1</sup>.<sup>1, 2, 4-6</sup>

## Reactions

The catalyst particulates sieved with sizes of 200-300 μm or 300-425 μm were loaded in a quartz reactor with an inner diameter of 0.6 cm or 0.8 cm and altered the reaction control volume of 0.066-0.50 mL at the total flow rate of 500 mL min<sup>-1</sup>, leading to achieve the gas hourly space velocities (GHSV) of 60,000-450,000 hr<sup>-1</sup>.<sup>1-8, 14</sup> In the typical selective catalytic NO<sub>x</sub> reduction (SCR) run, a quartz reactor bearing the catalyst particulates was situated inside a furnace, purged under 3 vol. % O<sub>2</sub>/N<sub>2</sub> at 500 °C for an hour, and exposed to a N<sub>2</sub>-balanced, wet feed gas composed of 800 ppm NO<sub>x</sub>, 800 ppm NH<sub>3</sub>, 3.0 vol. % O<sub>2</sub>, 5.4 vol. % H<sub>2</sub>O, or 500 ppm SO<sub>2</sub> at 150-400 °C with the total flow rate of 500 mL min<sup>-1</sup>.<sup>1-8, 14</sup> A gas component downstream of a quartz reactor was quantified using a ZKJ-2 (Fuji Electric Co.) and a detector tube (GASTEC Co.) for NO/N<sub>2</sub>O/O<sub>2</sub>/SO<sub>2</sub> and for NO<sub>2</sub>/NH<sub>3</sub>, respectively.<sup>1-8, 14</sup> Eqn. S6 and S7 served to evaluate NO<sub>x</sub> conversion (X<sub>NOX</sub>) and N<sub>2</sub> selectivity (S<sub>N2</sub>) for the catalyst, respectively. In Eqn. S6-S7, C<sub>j, IN</sub> and C<sub>j, OUT</sub> are referred to as the concentration of gaseous species j at the inlet (IN) and the outlet (OUT), respectively.<sup>1-8, 14</sup>

$$X_{NOX} (\%) = \frac{C_{NOX, IN} - C_{NOX, OUT}}{C_{NOX, IN}} \times 100 \quad (S6)$$

$$S_{N2} (\%) = \frac{C_{NO, IN} + C_{NH3, IN} - C_{NO, OUT} - C_{NH3, OUT} - C_{NO2, OUT} - 2 \times C_{N2O, OUT}}{C_{NO, IN} + C_{NH3, IN} - C_{NO, OUT} - C_{NH3, OUT}} \times 100 \quad (S7)$$

Eqn. S8 served to assess NO<sub>x</sub> consumption rate of the catalyst defined by the moles of NO<sub>x</sub> consumed in a per-BA<sup>-</sup>H<sup>+</sup> site and in a per-unit time basis (-r<sub>NOX</sub>).<sup>1-6, 8, 14</sup> In Eqn. S8, N<sub>NH3</sub> is referred to as the amount of NH<sub>3</sub> chemisorbed in a per-gram of the catalyst at 220 °C, as determined via its NH<sub>3</sub>-TPD experiment (Fig. S6-S7).<sup>1-6, 8, 14</sup>

$$-r_{NOX} (\text{min}^{-1}) = \frac{\text{moles of } NO_x \text{ consumed in a per-gram of the catalyst and in a per-unit time basis } (\Delta \text{mol}_{NOX} g_{CAT}^{-1} \text{min}^{-1})}{N_{NH3} \text{ of the catalyst } (\text{mol}_{NH3} g_{CAT}^{-1})} \quad (S8)$$

Eqn. S9 served to assess ABS consumption rate of the catalyst defined by the moles of ABS consumed in a per-BA<sup>-</sup>H<sup>+</sup> site and in a per-unit time basis (-r<sub>ABS</sub>).<sup>1, 2, 4-6</sup> In Eqn. S9, N<sub>NH3</sub> is referred to as the amount of NH<sub>3</sub> chemisorbed in a per-gram of the catalyst at 220 °C, as determined via its NH<sub>3</sub>-TPD experiment (Fig. S6-S7).<sup>1, 2, 4-6</sup> Moreover, in Eqn. S9, moles of ABS consumed in a per-gram of the catalyst (Δmol<sub>ABS</sub> g<sub>CAT</sub><sup>-1</sup>) and time span (Δt) required to quantify Δmol<sub>ABS</sub> g<sub>CAT</sub><sup>-1</sup> is determined via TGA-MASS dataset of the catalyst at 260 (<±0.3) °C, 270 (<±0.3) °C, 280 (<±0.3) °C, and 290 (<±0.3) °C.<sup>1, 2, 4-6</sup>

$$-r_{ABS} (\text{min}^{-1}) = \frac{\text{moles of ABS consumed in a per-gram of the catalyst } (\Delta \text{mol}_{ABS} g_{CAT}^{-1})}{N_{NH3} \text{ of the catalyst } (\text{mol}_{NH3} g_{CAT}^{-1}) \times \text{time span } (\Delta t) \text{ required to quantify } \Delta \text{mol}_{ABS} g_{CAT}^{-1} (\text{min})} \quad (S9)$$

**Table S1.** The numbers of  $V^{5+}$ -O- $Mn^{2+}$  channels in a per- $Mn^{2+}$  center ( $N_{V^{5+}-O-Mn^{2+}}$ ) pertaining to  $[Mn^{2+}-(O^{2-})_6]^{10-}$  sub-units for intact  $Mn_xV_2O_{x+5}$  architectures.

| X | geometry of sub-unit <sup>a</sup> | coordination number of $Mn^{2+}$ center <sup>a</sup> | bridged bond (type; number) <sup>a</sup>                                                                          | $N_{V^{5+}-O-Mn^{2+}}$ <sup>a</sup> |
|---|-----------------------------------|------------------------------------------------------|-------------------------------------------------------------------------------------------------------------------|-------------------------------------|
| 1 | <i>octahedral</i>                 | 6                                                    | ■ $Mn^{2+}/V^{5+}$ -O- $Mn^{2+}$ ( <i>bi</i> -; 4)<br>■ $V^{5+}/V^{5+}$ -O- $Mn^{2+}$ ( <i>bi</i> -; 2)           | 8                                   |
| 2 | <i>octahedral</i>                 | 6                                                    | ■ $Mn^{2+}/V^{5+}$ -O- $Mn^{2+}$ ( <i>bi</i> -; 4)<br>■ $Mn^{2+}/V^{5+}/V^{5+}$ -O- $Mn^{2+}$ ( <i>tri</i> -; 2)  | 8                                   |
| 3 | <i>octahedral</i>                 | 6                                                    | ■ $Mn^{2+}/V^{5+}$ -O- $Mn^{2+}$ ( <i>bi</i> -; 4)<br>■ $Mn^{2+}/Mn^{2+}/V^{5+}$ -O- $Mn^{2+}$ ( <i>tri</i> -; 2) | 6                                   |

<sup>a</sup> See Fig. 1D-1F.

**Table S2.** The numbers of Mn<sup>2+</sup>-O-V<sup>5+</sup> channels in a per-V<sup>5+</sup> center (N<sub>Mn2+-O-V5+</sub>) pertaining to [V<sup>5+</sup>-(O<sup>2-</sup>)<sub>6</sub>]<sup>7-</sup> and [V<sup>5+</sup>-(O<sup>2-</sup>)<sub>4</sub>]<sup>3-</sup> sub-units for intact Mn<sub>x</sub>V<sub>2</sub>O<sub>x+5</sub> architectures with X values of 1 and ≥2, respectively.

| X | geometry of sub-unit <sup>a</sup> | coordination number of V <sup>5+</sup> center <sup>a</sup> | bridged bond (type; number) <sup>a</sup>                                                                                                                                                                                                                                  | N <sub>Mn2+-O-V5+</sub> <sup>a</sup> |
|---|-----------------------------------|------------------------------------------------------------|---------------------------------------------------------------------------------------------------------------------------------------------------------------------------------------------------------------------------------------------------------------------------|--------------------------------------|
| 1 | <i>octahedral</i>                 | 6                                                          | <ul style="list-style-type: none"> <li>■ V<sup>5+</sup>/V<sup>5+</sup>-O-V<sup>5+</sup> (<i>bi-</i>; 3)</li> <li>■ V<sup>5+</sup>/Mn<sup>2+</sup>-O-V<sup>5+</sup> (<i>bi-</i>; 2)</li> <li>■ Mn<sup>2+</sup>/Mn<sup>2+</sup>-O-V<sup>5+</sup> (<i>bi-</i>; 1)</li> </ul> | 4                                    |
| 2 | <i>tetrahedral</i>                | 4                                                          | <ul style="list-style-type: none"> <li>■ V<sup>5+</sup>-O-V<sup>5+</sup> (<i>non-</i>; 1)</li> <li>■ Mn<sup>2+</sup>/Mn<sup>2+</sup>-O-V<sup>5+</sup> (<i>bi-</i>; 3)</li> </ul>                                                                                          | 6                                    |
| 3 | <i>tetrahedral</i>                | 4                                                          | <ul style="list-style-type: none"> <li>■ Mn<sup>2+</sup>/Mn<sup>2+</sup>-O-V<sup>5+</sup> (<i>bi-</i>; 3)</li> <li>■ Mn<sup>2+</sup>/Mn<sup>2+</sup>/Mn<sup>2+</sup>-O-V<sup>5+</sup> (<i>tri-</i>; 1)</li> </ul>                                                         | 9                                    |

<sup>a</sup> See Fig. 1D-1F.

**Table S3.** The hierarchies predicted concerning the properties of  $Mn_xV_2O_{x+5}$  architectures ( $X=1-3$ ) with the use of their  $N_{V5+-O-Mn2+}$  or  $N_{Mn2+-O-V5+}$  values and those identified for the  $Mn_x$  catalysts via experiments.

| X                                       | anticipated for $Mn_xV_2O_{x+5}$ |   |   |                  |   |   | identified for $Mn_x$<br>experimental<br>result |
|-----------------------------------------|----------------------------------|---|---|------------------|---|---|-------------------------------------------------|
|                                         | $N_{V5+-O-Mn2+}$                 |   |   | $N_{Mn2+-O-V5+}$ |   |   |                                                 |
|                                         | 1                                | 2 | 3 | 1                | 2 | 3 |                                                 |
| $N_{V5+-O-Mn2+}$ (or $N_{Mn2+-O-V5+}$ ) | 8                                | 8 | 6 | 4                | 6 | 8 | -                                               |
| $N_{NH3}$                               | X of $1 \sim 2 > 3$              |   |   | X of $1 < 2 < 3$ |   |   | $1 \sim 2 < 3$ <sup>a</sup>                     |
| $K'_{APP,0}$                            | X of $1 \sim 2 > 3$              |   |   | X of $1 < 2 < 3$ |   |   | $1 \sim 2 < 3$ <sup>b</sup>                     |
| $E_{NH3}$                               | X of $1 \sim 2 < 3$              |   |   | X of $1 > 2 > 3$ |   |   | $1 \sim 2 < 3$ <sup>a</sup>                     |
| $E_{BARRIER}$                           | X of $1 \sim 2 < 3$              |   |   | X of $1 > 2 > 3$ |   |   | $1 \sim 2 < 3$ <sup>b</sup>                     |
| $N_{OL}$                                | X of $1 \sim 2 > 3$              |   |   | -                |   |   | $1 \sim 2 > 3$ <sup>c</sup>                     |
| $E_{OL}$                                | -                                |   |   | X of $1 < 2 < 3$ |   |   | $1 \sim 2 < 3$ <sup>c</sup>                     |
| $N_{OM}$ ( $\sim N_{OV}$ )              | X of $1 \sim 2 > 3$              |   |   | -                |   |   | $1 \sim 2 > 3$ <sup>d</sup>                     |
| $E_{OM}$                                | X of $1 \sim 2 < 3$              |   |   | X of $1 > 2 > 3$ |   |   | $1 \sim 2 < 3$ <sup>d</sup>                     |
| $O_M$ mobility                          | X of $1 \sim 2 > 3$              |   |   | X of $1 < 2 < 3$ |   |   | $1 \sim 2 > 3$ <sup>d</sup>                     |

<sup>a</sup> via  $NH_3$ -TPD (Fig. 4A, Fig. S6-S7, and Table S7). <sup>b</sup> via Arrhenius plot (Fig. 4C). <sup>c</sup> via XP spectroscopy (Fig. S8 and Table S5). <sup>d</sup> via  $O_2$ -pulsed chemisorption (Table S4) or  $O_2$ -TPD (Fig. 6A, Fig. S10-S11, and Table S9).

**Table S4.** Properties of the catalysts.

|                                                                                                                 | Mn <sub>1</sub> | Mn <sub>2</sub> | Mn <sub>3</sub> | Mn <sub>1</sub> -Sb | Mn <sub>1</sub> -P | Mn <sub>2</sub> -P | Mn <sub>3</sub> -P | Mn <sub>1</sub> -Sb -P |
|-----------------------------------------------------------------------------------------------------------------|-----------------|-----------------|-----------------|---------------------|--------------------|--------------------|--------------------|------------------------|
| S <sub>BET, N<sub>2</sub></sub> <sup>a, b</sup> (mN <sub>2</sub> <sup>2</sup> g <sub>CAT</sub> <sup>-1</sup> )  | -               | -               | -               | -                   | 76.5 (±4.2)        | 74.9 (±3.5)        | 74.9 (±4.8)        | 70.9 (±3.5)            |
| V <sub>BJH, N<sub>2</sub></sub> <sup>a, c</sup> (cmN <sub>2</sub> <sup>3</sup> g <sub>CAT</sub> <sup>-1</sup> ) | -               | -               | -               | -                   | 0.3 (±0.1)         | 0.3 (±0.1)         | 0.3 (±0.1)         | 0.3 (±0.1)             |
| Mn/V (bulk) <sup>d, e, f</sup>                                                                                  | -               | -               | -               | -                   | 0.5 (±0.1)         | 1.0 (±0.1)         | 1.4 (±0.1)         | 0.5 (±0.1)             |
| Mn/V (surface) <sup>d, g</sup>                                                                                  | -               | -               | -               | -                   | 0.2 (±0.1)         | 0.4 (±0.1)         | 0.7 (±0.1)         | 0.2 (±0.1)             |
| Mn/V (surface) <sup>d, h</sup>                                                                                  | -               | -               | -               | -                   | 0.2 (±0.1)         | 0.4 (±0.1)         | 0.7 (±0.1)         | 0.2 (±0.1)             |
| P/metal (bulk) <sup>d, e, f, i</sup>                                                                            | -               | -               | -               | -                   | 0.3 (±0.1)         | 0.2 (±0.1)         | 0.2 (±0.1)         | 0.2 (±0.1)             |
| P/metal (surface) <sup>d, g, i</sup>                                                                            | -               | -               | -               | -                   | 0.7 (±0.1)         | 0.6 (±0.1)         | 0.7 (±0.1)         | 0.7 (±0.1)             |
| P/metal (surface) <sup>d, h, i</sup>                                                                            | -               | -               | -               | -                   | 0.7 (±0.1)         | 0.7 (±0.1)         | 0.7 (±0.1)         | 0.7 (±0.1)             |
| metal/V (surface) <sup>d, g, i</sup>                                                                            | -               | -               | -               | -                   | 0.2 (±0.1)         | 0.4 (±0.1)         | 0.7 (±0.1)         | 0.6 (±0.1)             |
| metal/V (surface) <sup>d, h, i</sup>                                                                            | -               | -               | -               | -                   | 0.2 (±0.1)         | 0.4 (±0.1)         | 0.7 (±0.1)         | 0.6 (±0.1)             |
| N <sub>CO</sub> <sup>j</sup> (X10 <sup>-1</sup> μmol <sub>CO</sub> g <sub>CAT</sub> <sup>-1</sup> )             | 2.1 (±0.1)      | 5.4 (±0.3)      | 5.0 (±0.3)      | 2.8 (±0.1)          | 1.7 (±0.1)         | 4.2 (±0.2)         | 4.4 (±0.1)         | 2.4 (±0.1)             |
| N <sub>O<sub>2</sub></sub> <sup>k</sup> (μmol <sub>O<sub>2</sub></sub> g <sub>CAT</sub> <sup>-1</sup> )         | -               | -               | -               | -                   | 27.3 (±2.0)        | 29.5 (±2.6)        | 21.5 (±1.8)        | 27.2 (±2.4)            |

<sup>a</sup> via N<sub>2</sub> physisorption at -196 °C. <sup>b</sup> via BET theory. <sup>c</sup> via BJH theory. <sup>d</sup> molar ratio. <sup>e</sup> via ICP-OES. <sup>f</sup> via ICP-AAS. <sup>g</sup> via XP spectroscopy. <sup>h</sup> via EDX mapping. <sup>i</sup> metal of Mn+V for Mn<sub>x</sub>-P; Mn+V+Sb for Mn<sub>1</sub>-Sb-P. <sup>j</sup> via CO-pulsed chemisorption at 50 °C. <sup>k</sup> via O<sub>2</sub>-pulsed chemisorption at 250 °C.



**Table S5.** Locations and compositions of phases present in the catalyst surfaces examined via XP spectra.

| region                                  | phase                                           | Mn <sub>1</sub> -P |                 | Mn <sub>2</sub> -P |                 | Mn <sub>3</sub> -P |                 | Mn <sub>1</sub> -Sb-P |                 |
|-----------------------------------------|-------------------------------------------------|--------------------|-----------------|--------------------|-----------------|--------------------|-----------------|-----------------------|-----------------|
|                                         |                                                 | location (eV)      | composition (%) | location (eV)      | composition (%) | location (eV)      | composition (%) | location (eV)         | composition (%) |
| Mn 2p <sub>1/2</sub> <sup>a, b, c</sup> | Mn <sup>2+</sup> (●)                            | 652.3              | 41.2            | 652.3              | 28.6            | 652.7              | 28.2            | 652.0                 | 36.1            |
|                                         | Mn <sup>3+</sup> (●)                            | 653.7              | 36.7            | 653.7              | 32.6            | 654.1              | 48.4            | 653.4                 | 33.8            |
|                                         | Mn <sup>4+</sup> (●)                            | 655.5              | 22.1            | 655.5              | 38.8            | 655.9              | 23.4            | 655.2                 | 30.1            |
| Mn 2p <sub>3/2</sub> <sup>a, b, c</sup> | Mn <sup>2+</sup> (○)                            | 640.9              | 41.2            | 640.9              | 28.6            | 641.3              | 28.2            | 640.6                 | 36.1            |
|                                         | Mn <sup>3+</sup> (○)                            | 642.0              | 36.7            | 642.0              | 32.6            | 642.4              | 48.4            | 641.7                 | 33.8            |
|                                         | Mn <sup>4+</sup> (○)                            | 643.5              | 22.1            | 643.5              | 38.8            | 643.9              | 23.4            | 643.2                 | 30.1            |
| V 2p <sub>3/2</sub> <sup>a, b, d</sup>  | V <sup>3+</sup> (○)                             | 515.6              | 35.2            | 515.3              | 19.1            | 515.0              | 7.0             | 515.9                 | 49.5            |
|                                         | V <sup>4+</sup> (○)                             | 516.6              | 21.9            | 516.3              | 33.3            | 516.0              | 16.4            | 516.9                 | 26.4            |
|                                         | V <sup>5+</sup> (○)                             | 517.3              | 42.9            | 517.0              | 47.6            | 516.7              | 76.6            | 517.6                 | 24.1            |
| P 2p <sub>3/2</sub> <sup>a, b, e</sup>  | PO <sub>4</sub> <sup>3-</sup> (○)               | 131.7              | 11.2            | 131.7              | 11.4            | 131.7              | 10.9            | 131.7                 | 11.8            |
|                                         | HPO <sub>4</sub> <sup>2-</sup> (○)              | 132.7              | 8.1             | 132.7              | 9.6             | 132.7              | 9.5             | 132.7                 | 8.5             |
|                                         | H <sub>2</sub> PO <sub>4</sub> <sup>-</sup> (○) | 133.6              | 80.7            | 133.6              | 79.0            | 133.6              | 79.6            | 133.6                 | 79.7            |
| O 1s <sup>a, b, f</sup>                 | O <sub>β</sub> (○)                              | 529.9              | 64.6            | 529.9              | 67.1            | 529.9              | 71.0            | 530.0                 | 63.1            |
|                                         | O <sub>α</sub> (○)                              | 530.5              | 30.4            | 530.5              | 29.9            | 530.3              | 24.2            | 530.7                 | 34.1            |
|                                         | O <sub>α'</sub> (○)                             | 532.0              | 5.0             | 532.0              | 3.0             | 532.0              | 4.8             | 532.0                 | 2.8             |

<sup>a</sup> de-convoluted using Gaussian functions. <sup>b</sup> peak resolution of 0.1 eV. <sup>c</sup> See Fig. S3. <sup>d</sup> See Fig. S4. <sup>e</sup> See Fig. 3A-3D. <sup>f</sup> See Fig. S8.

**Table S6.** Locations and compositions of PO<sub>4</sub><sup>3-</sup> modifier and its protonated analogues present in the catalyst surfaces examined via <sup>31</sup>P MAS NMR spectra.

| functionality                                                   | Mn <sub>1</sub> -P |                 | Mn <sub>2</sub> -P |                 | Mn <sub>3</sub> -P |                 | Mn <sub>1</sub> -Sb-P |                 |
|-----------------------------------------------------------------|--------------------|-----------------|--------------------|-----------------|--------------------|-----------------|-----------------------|-----------------|
|                                                                 | location (ppm)     | composition (%) | location (ppm)     | composition (%) | location (ppm)     | composition (%) | location (ppm)        | composition (%) |
| PO <sub>4</sub> <sup>3-</sup> (○) <sup>a, b</sup>               | -24.6              | 11.5            | -24.6              | 11.8            | -24.6              | 11.0            | -24.6                 | 11.3            |
| HPO <sub>4</sub> <sup>2-</sup> (○) <sup>a, b</sup>              | -17.6              | 7.7             | -17.6              | 9.8             | -17.6              | 9.1             | -17.6                 | 8.5             |
| H <sub>2</sub> PO <sub>4</sub> <sup>-</sup> (○) <sup>a, b</sup> | -10.6              | 80.8            | -10.6              | 78.4            | -10.6              | 79.9            | -10.6                 | 80.2            |

<sup>a</sup> de-convoluted using Gaussian functions. <sup>b</sup> See Fig. 3E-3H.

**Table S7.**  $T_{\text{MAX}}$  values and slopes of  $\ln(\beta/T_{\text{MAX}}^2)$  versus  $1/T_{\text{MAX}}$  for the sub-bands pertaining to the de-convoluted  $\text{NH}_3$ -TPD profiles of the catalysts recorded post  $\text{NH}_3$  chemisorption at 220 °C with  $\beta$  values of 10-30 °C min<sup>-1</sup>.

| sub-band            | $\beta$ (°C min <sup>-1</sup> ) | $T_{\text{MAX}}$ (°C) |                    |                        |                        |
|---------------------|---------------------------------|-----------------------|--------------------|------------------------|------------------------|
|                     |                                 | Mn <sub>1</sub> -P    | Mn <sub>2</sub> -P | Mn <sub>3</sub> -P     | Mn <sub>1</sub> -Sb- P |
| I <sup>a, b</sup>   | 10                              | 346.4                 | 337.2              | 370.3                  | 362.3                  |
|                     | 20                              | 350.0                 | 340.0              | 373.2                  | 366.0                  |
|                     | 30                              | 352.7                 | 342.8              | 376.0                  | 369.4                  |
| II <sup>a, b</sup>  | 10                              | 403.3                 | 403.6              | 417.5                  | 396.2                  |
|                     | 20                              | 407.2                 | 407.0              | 420.7                  | 400.6                  |
|                     | 30                              | 410.5                 | 410.3              | 424.0                  | 403.8                  |
| III <sup>a, b</sup> | 10                              | 483.0                 | 499.9              | 522.1                  | 452.6                  |
|                     | 20                              | 487.0                 | 504.0              | 526.0                  | 457.0                  |
|                     | 30                              | 491.4                 | 508.4              | 530.4                  | 461.2                  |
| sub-band            | slope <sup>d, e</sup> (K)       |                       |                    |                        |                        |
|                     | Mn <sub>1</sub> -P              | Mn <sub>2</sub> -P    | Mn <sub>3</sub> -P | Mn <sub>1</sub> -Sb- P |                        |
| I <sup>c</sup>      | -2928.5                         | -3355.7               | -3673.2            | -3645.2                |                        |
| II <sup>c</sup>     | -3014.5                         | -3380.0               | -3667.4            | -2690.9                |                        |
| III <sup>c</sup>    | -3172.6                         | -3294.4               | -3648.9            | -2769.1                |                        |

<sup>a</sup> de-convoluted using Gaussian functions. <sup>b</sup> See Fig. S6-S7. <sup>c</sup> See Fig. 4A. <sup>d</sup> via TPD theory. <sup>e</sup> regression factors ( $R^2$ ) of  $\geq 0.99$ .

**Table S8.**  $-r_{\text{NOX}}$  values of the catalysts recorded at 205-250 °C.

| $T_{\text{REACTION}}$ (°C) | $-r_{\text{NOX}}^{a,b,c}$ ( $\times 10^{-1} \text{ min}^{-1}$ ) |                    |                    |                        |
|----------------------------|-----------------------------------------------------------------|--------------------|--------------------|------------------------|
|                            | Mn <sub>1</sub> -P                                              | Mn <sub>2</sub> -P | Mn <sub>3</sub> -P | Mn <sub>1</sub> -Sb- P |
| 205                        | 1.9 ( $\pm 0.1$ )                                               | 1.8 ( $\pm 0.1$ )  | 1.1 ( $\pm 0.1$ )  | 2.1 ( $\pm 0.1$ )      |
| 220                        | 2.7 ( $\pm 0.1$ )                                               | 2.7 ( $\pm 0.1$ )  | 1.6 ( $\pm 0.1$ )  | 3.0 ( $\pm 0.1$ )      |
| 235                        | 4.0 ( $\pm 0.1$ )                                               | 4.0 ( $\pm 0.3$ )  | 2.6 ( $\pm 0.1$ )  | 4.3 ( $\pm 0.1$ )      |
| 250                        | 5.5 ( $\pm 0.1$ )                                               | 5.3 ( $\pm 0.1$ )  | 3.4 ( $\pm 0.1$ )  | 6.2 ( $\pm 0.1$ )      |

<sup>a</sup> SCR environments: 800 ppm NO<sub>x</sub>; 800 ppm NH<sub>3</sub>; 3.0 vol. % O<sub>2</sub>; 5.4 vol. % H<sub>2</sub>O; catalyst sieved with sizes of 300-425 μm; GHSV of 350,000 hr<sup>-1</sup>; total flow rate of 500 mL min<sup>-1</sup>; balanced by a N<sub>2</sub>. <sup>b</sup> X<sub>NOX</sub> values of <30.0 %. <sup>c</sup> S<sub>N2</sub> values of ~100.0 %.

**Table S9.**  $T_{MAX}$  values and slopes of  $\ln(\beta/T_{MAX}^2)$  versus  $1/T_{MAX}$  for the sub-bands pertaining to the de-convoluted  $O_2$ -TPD profiles of the catalysts recorded post  $O_2$  chemisorption at 50 °C with  $\beta$  values of 10-30 °C min<sup>-1</sup>.

| sub-band            | $\beta$ (°C min <sup>-1</sup> ) | $T_{MAX}$ (°C)     |                    |                        |                        |
|---------------------|---------------------------------|--------------------|--------------------|------------------------|------------------------|
|                     |                                 | Mn <sub>1</sub> -P | Mn <sub>2</sub> -P | Mn <sub>3</sub> -P     | Mn <sub>1</sub> -Sb- P |
| I <sup>a, b</sup>   | 10                              | 290.2              | 302.9              | 312.0                  | 232.6                  |
|                     | 20                              | 293.0              | 305.4              | 314.8                  | 235.0                  |
|                     | 30                              | 295.2              | 308.5              | 317.0                  | 237.4                  |
| II <sup>a, b</sup>  | 10                              | 443.5              | 419.6              | 398.2                  | 364.8                  |
|                     | 20                              | 447.6              | 423.5              | 401.8                  | 368.4                  |
|                     | 30                              | 451.6              | 426.8              | 404.6                  | 372.0                  |
| III <sup>a, b</sup> | 10                              | 488.1              | 485.9              | 465.4                  | 487.2                  |
|                     | 20                              | 492.1              | 490.0              | 469.5                  | 492.6                  |
|                     | 30                              | 496.9              | 494.3              | 472.9                  | 496.8                  |
| sub-band            | slope <sup>d, e</sup> (K)       |                    |                    |                        |                        |
|                     | Mn <sub>1</sub> -P              | Mn <sub>2</sub> -P | Mn <sub>3</sub> -P | Mn <sub>1</sub> -Sb- P |                        |
| I <sup>c</sup>      | -3219.6                         | -2909.2            | -3517.8            | -2655.3                |                        |
| II <sup>c</sup>     | -2935.1                         | -3194.2            | -3419.9            | -2618.4                |                        |
| III <sup>c</sup>    | -3001.9                         | -3205.6            | -3516.4            | -2611.4                |                        |

<sup>a</sup> de-convoluted using Gaussian functions. <sup>b</sup> See Fig. S10-S11. <sup>c</sup> See Fig. 6A. <sup>d</sup> via TPD theory. <sup>e</sup> regression factors ( $R^2$ ) of  $\geq 0.99$ .

**Table S10.** Coefficients utilized to simulate H<sub>2</sub>O isotherms of the catalysts recorded at 10-40 °C.

| catalyst                           | temperature<br>(°C) | coefficient <sup>a</sup>                                   |                           |                      | regression<br>factor (R <sup>2</sup> ) |
|------------------------------------|---------------------|------------------------------------------------------------|---------------------------|----------------------|----------------------------------------|
|                                    |                     | A<br>(mmol <sub>H2O</sub> g <sub>CAT</sub> <sup>-1</sup> ) | B<br>(bar <sup>-1</sup> ) | C<br>(dimensionless) |                                        |
| Mn <sub>1</sub> -P <sup>b</sup>    | 10                  | 14441.40                                                   | 0.42X10 <sup>-3</sup>     | 0.21                 | 0.99                                   |
|                                    | 25                  | 40.95                                                      | 0.41X10 <sup>-1</sup>     | 4.01                 | 0.99                                   |
|                                    | 40                  | 8.31                                                       | 0.15X10 <sup>0</sup>      | 1.99                 | 0.99                                   |
| Mn <sub>2</sub> -P <sup>b</sup>    | 10                  | 13441.38                                                   | 0.10X10 <sup>-2</sup>     | 0.19                 | 0.99                                   |
|                                    | 25                  | 37.95                                                      | 0.10X10 <sup>0</sup>      | 4.01                 | 0.99                                   |
|                                    | 40                  | 7.05                                                       | 0.31X10 <sup>0</sup>      | 4.01                 | 0.99                                   |
| Mn <sub>3</sub> -P <sup>b</sup>    | 10                  | 13520.57                                                   | 0.10X10 <sup>-2</sup>     | 0.19                 | 0.99                                   |
|                                    | 25                  | 37.11                                                      | 0.11X10 <sup>0</sup>      | 4.01                 | 0.99                                   |
|                                    | 40                  | 8.38                                                       | 0.39X10 <sup>0</sup>      | 4.02                 | 0.99                                   |
| Mn <sub>1</sub> -Sb-P <sup>b</sup> | 10                  | 14692.74                                                   | 0.54X10 <sup>-3</sup>     | 0.22                 | 0.99                                   |
|                                    | 25                  | 54.22                                                      | 0.60X10 <sup>-2</sup>     | 4.01                 | 0.99                                   |
|                                    | 40                  | 8.13                                                       | 0.31X10 <sup>0</sup>      | 2.02                 | 0.99                                   |

<sup>a</sup> via Toth fitting. <sup>b</sup> See Fig. S12.

**Table S11.**  $T_{MAX}$  values and slopes of  $\ln(\beta/T_{MAX}^2)$  versus  $1/T_{MAX}$  for the sub-bands pertaining to the de-convoluted  $SO_2$ -TPD profiles of the catalysts recorded post  $SO_2$  chemisorption at 220 °C with  $\beta$  values of 10-20 °C min<sup>-1</sup>.

| sub-band            | $\beta$ (°C min <sup>-1</sup> )                | $T_{MAX}$ (°C)                                 |                       |
|---------------------|------------------------------------------------|------------------------------------------------|-----------------------|
|                     |                                                | V <sub>2</sub> O <sub>5</sub> -WO <sub>3</sub> | Mn <sub>1</sub> -Sb-P |
| I <sup>a, b</sup>   | 10                                             | 473.6                                          | 500.0                 |
|                     | 15                                             | 475.0                                          | 501.8                 |
|                     | 20                                             | 476.1                                          | 503.7                 |
| II <sup>a, b</sup>  | 10                                             | 608.0                                          | 620.0                 |
|                     | 15                                             | 610.0                                          | 622.7                 |
|                     | 20                                             | 611.6                                          | 625.0                 |
| III <sup>a, b</sup> | 10                                             | 685.0                                          | 636.7                 |
|                     | 15                                             | 687.0                                          | 639.5                 |
|                     | 20                                             | 689.2                                          | 641.5                 |
| IV <sup>a, b</sup>  | 10                                             | 740.5                                          | 675.0                 |
|                     | 15                                             | 743.0                                          | 677.8                 |
|                     | 20                                             | 745.2                                          | 680.2                 |
| V <sup>a, b</sup>   | 10                                             | 819.2                                          | 770.4                 |
|                     | 15                                             | 822.0                                          | 773.6                 |
|                     | 20                                             | 824.8                                          | 776.5                 |
| sub-band            | slope <sup>d, e</sup> (K)                      |                                                |                       |
|                     | V <sub>2</sub> O <sub>5</sub> -WO <sub>3</sub> | Mn <sub>1</sub> -Sb-P                          |                       |
| I <sup>c</sup>      | -6236.2                                        | -4082.5                                        |                       |
| II <sup>c</sup>     | -5720.8                                        | -3765.8                                        |                       |
| III <sup>c</sup>    | -5693.0                                        | -4139.1                                        |                       |
| IV <sup>c</sup>     | -5581.2                                        | -4120.5                                        |                       |
| V <sup>c</sup>      | -5243.0                                        | -4134.5                                        |                       |

<sup>a</sup> de-convoluted using Gaussian functions. <sup>b</sup> See Fig. S14. <sup>c</sup> See Fig. 8A. <sup>d</sup> via TPD theory. <sup>e</sup> regression factors ( $R^2$ ) of  $\geq 0.98$ .

**Table S12.** TGA-MASS dataset utilized to assess  $-r_{\text{ABS}}$  values of the AS/ABS-poisoned catalysts at 260-290 °C.

| AS/ABS-poisoned catalyst <sup>a</sup>          | T <sub>REACTION</sub> <sup>b</sup> (°C) | ΔT <sub>REACTION</sub> (°C) | Δt (minute) | ΔN <sub>AS/ABS</sub> <sup>c, d, e</sup> (μmol <sub>ABS</sub> g <sub>CAT</sub> <sup>-1</sup> ) | -r <sub>ABS</sub> <sup>f</sup> (X10 <sup>-2</sup> min <sup>-1</sup> ) |
|------------------------------------------------|-----------------------------------------|-----------------------------|-------------|-----------------------------------------------------------------------------------------------|-----------------------------------------------------------------------|
| Mn <sub>1</sub> -Sb-P                          | 260                                     | 0.50                        | 0.10        | 0.92                                                                                          | 7.75                                                                  |
|                                                | 270                                     | 0.35                        | 0.07        | 0.74                                                                                          | 8.86                                                                  |
|                                                | 280                                     | 0.48                        | 0.10        | 1.11                                                                                          | 9.62                                                                  |
|                                                | 290                                     | 0.43                        | 0.09        | 1.11                                                                                          | 10.74                                                                 |
| V <sub>2</sub> O <sub>5</sub> -WO <sub>3</sub> | 260                                     | 0.10                        | 0.02        | 0.19                                                                                          | 4.36                                                                  |
|                                                | 270                                     | 0.08                        | 0.02        | 0.19                                                                                          | 5.26                                                                  |
|                                                | 280                                     | 0.15                        | 0.03        | 0.38                                                                                          | 5.82                                                                  |
|                                                | 290                                     | 0.20                        | 0.04        | 0.58                                                                                          | 6.55                                                                  |

<sup>a</sup> AS/ABS poison environments: 800 ppm NO<sub>x</sub>; 800 ppm NH<sub>3</sub>; 500 ppm SO<sub>2</sub>; 3.0 vol. % O<sub>2</sub>; 5.4 vol. % H<sub>2</sub>O; 180 °C; 30 hours; catalysts sieved with sizes of 300-425 μm; GHSV of 60,000 hr<sup>-1</sup>; total flow rate of 500 mL min<sup>-1</sup>; balanced by a N<sub>2</sub>. <sup>b</sup> deviation of <± 0.3 °C from 260-290 °C. <sup>c</sup> AS/ABS pyrolysis environments: total flow rate of 50 mL min<sup>-1</sup>; ramping rate of 5 °C min<sup>-1</sup>; under an Ar. <sup>d</sup> presuming the entire transformation of AS into ABS at <260 °C. <sup>e</sup> See Fig. S15. <sup>f</sup> X<sub>ABS</sub> values of <20.0%.



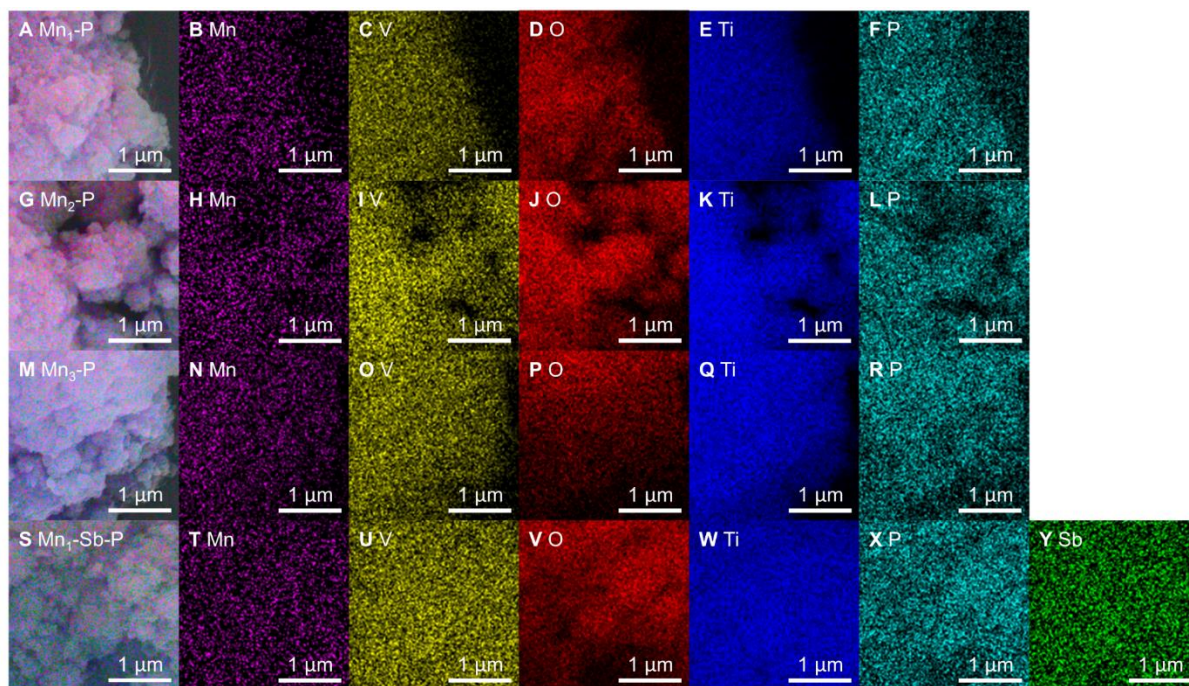

**Fig. S1.** EDX mapping images of the catalysts (Mn<sub>1</sub>-P for (A-F); Mn<sub>2</sub>-P for (G-L); Mn<sub>3</sub>-P for (M-R); Mn<sub>1</sub>-Sb-P for (S-Y)).

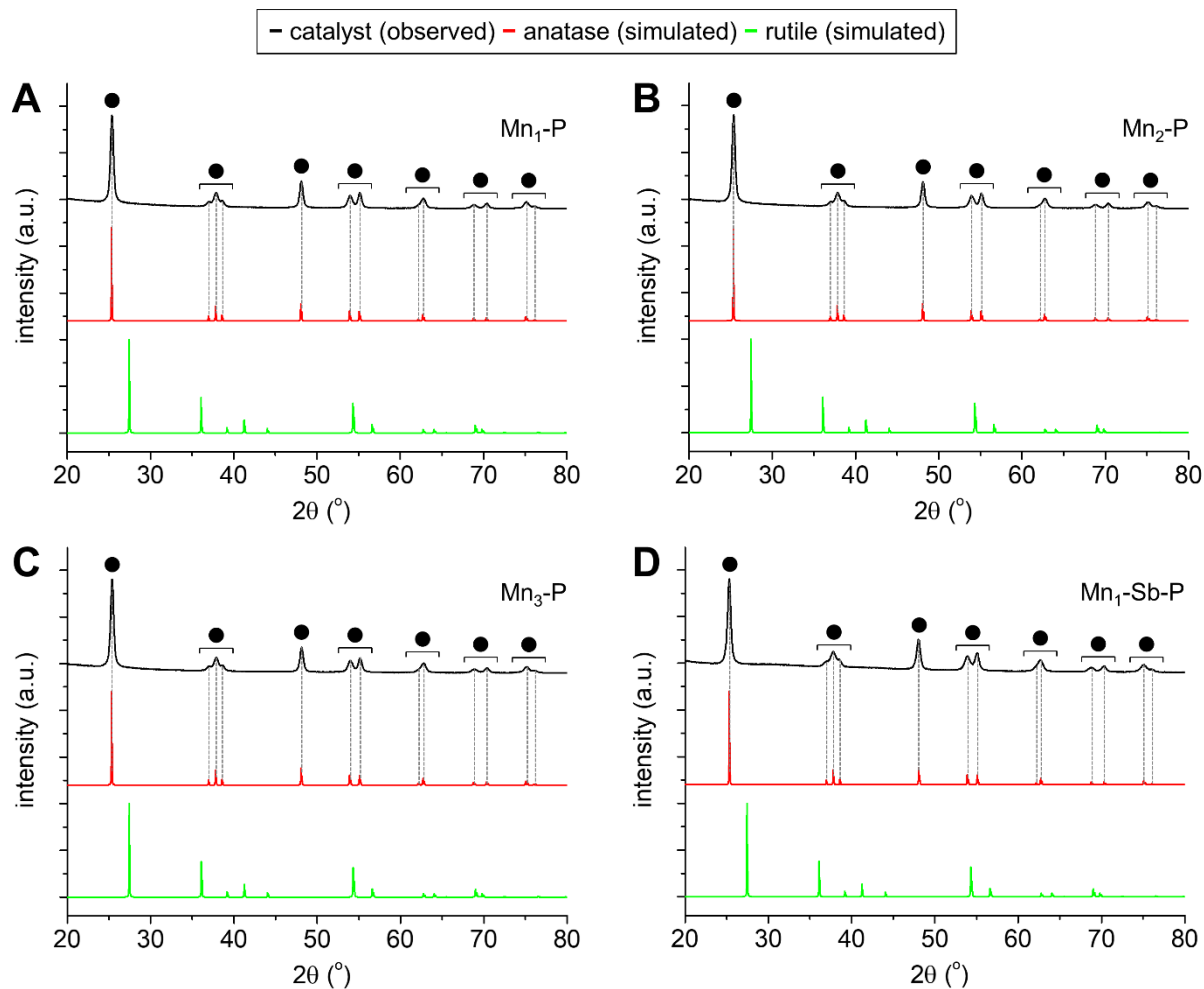

**Fig. S2.** XRD patterns of the catalysts (black solid lines;  $Mn_1-P$  for (A);  $Mn_2-P$  for (B);  $Mn_3-P$  for (C);  $Mn_1-Sb-P$  for (D)) and those simulated for *tetragonal*  $TiO_2$  polymorphs (red solid lines for anatase (JCPDF No. of 01-071-1166); green solid lines for rutile (JCPDF No. of 01-072-1148)). In (A-D), black solid circles indicate the bulk facets indexed to those for *tetragonal* anatase.

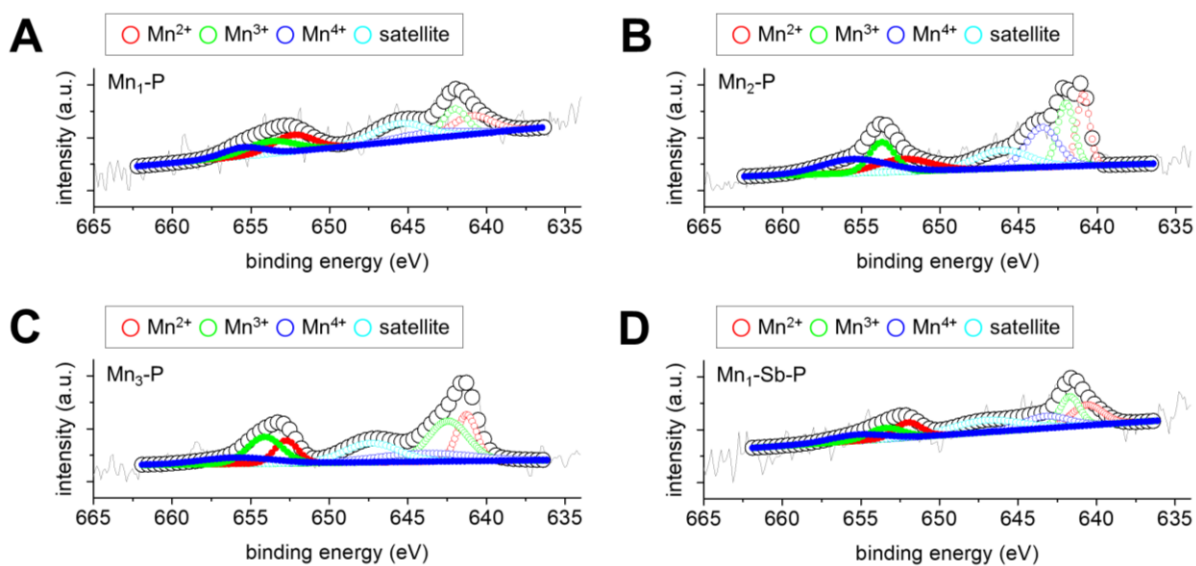

**Fig. S3.** XP spectra of the catalysts in the Mn 2p regimes (Mn<sub>1</sub>-P for (A); Mn<sub>2</sub>-P for (B); Mn<sub>3</sub>-P for (C); Mn<sub>1</sub>-Sb-P for (D)). In (A-D), gray solid lines and black empty circles correspond to the raw spectra and those fitted using Gaussian functions, respectively. Moreover, in (A-D), red/green/blue and cyan empty circles indicate surface Mn<sup>2+</sup>/Mn<sup>3+</sup>/Mn<sup>4+</sup> species and satellite positioned in the Mn 2p<sub>3/2</sub> domains, respectively, whereas red/green/blue solid circles correspond to surface Mn<sup>2+</sup>/Mn<sup>3+</sup>/Mn<sup>4+</sup> species situated in the Mn 2p<sub>1/2</sub> regions with their relative abundance being detailed in Table S5.

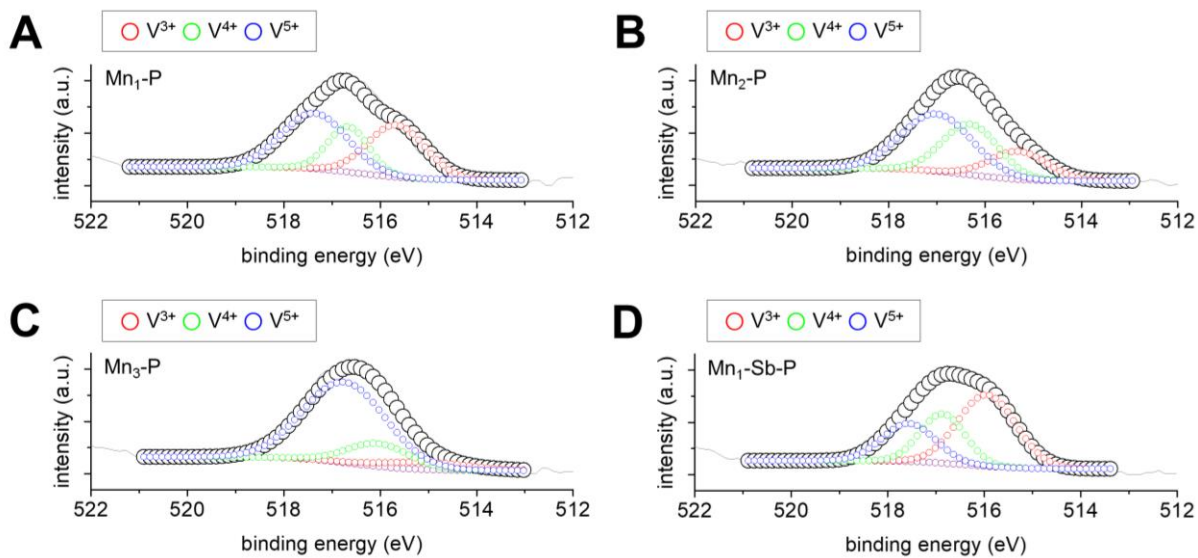

**Fig. S4.** XP spectra of the catalysts in the V  $2p_{3/2}$  regimes ( $Mn_1$ -P for (A);  $Mn_2$ -P for (B);  $Mn_3$ -P for (C);  $Mn_1$ -Sb-P for (D)). In (A-D), gray solid lines and black empty circles correspond to the raw spectra and those fitted using Gaussian functions, respectively, whereas red/green/blue empty circles indicate surface  $V^{3+}/V^{4+}/V^{5+}$  species with their relative abundance being detailed in Table S5.

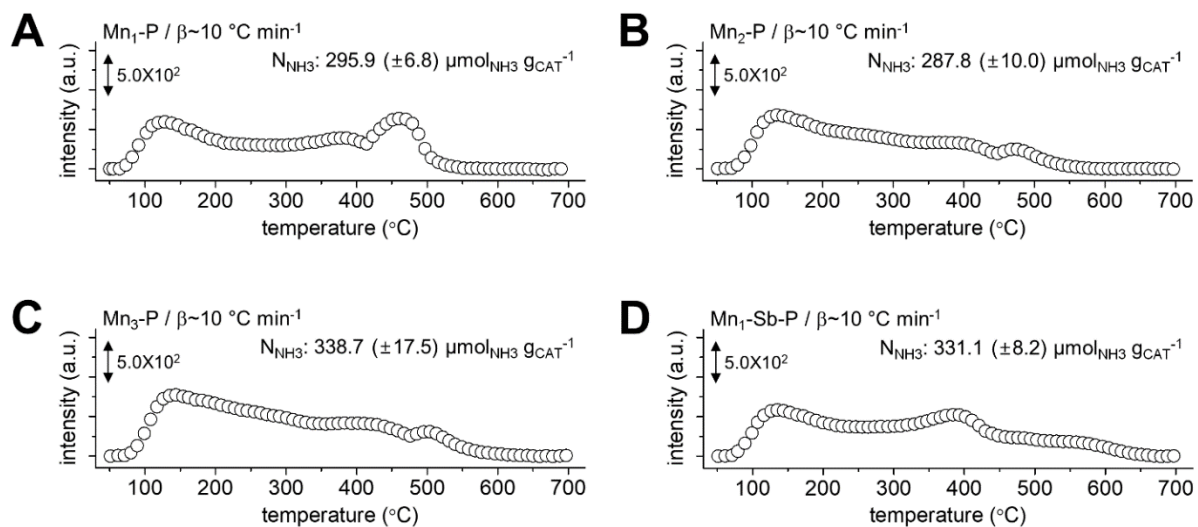

**Fig. S5.** NH<sub>3</sub>-TPD profiles (TCD signal *versus* temperature) of the catalysts (Mn<sub>1</sub>-P for (A); Mn<sub>2</sub>-P for (B); Mn<sub>3</sub>-P for (C); Mn<sub>1</sub>-Sb-P for (D)), whose surfaces chemisorbed NH<sub>3</sub> molecules at 50 °C and were heated to 700 °C with a ramping rate ( $\beta$ ) of 10 °C min<sup>-1</sup>. In (A-D),  $N_{\text{NH}_3}$  values indicate the amounts of NH<sub>3</sub> chemisorbed in a per-gram of the catalysts at 50 °C.

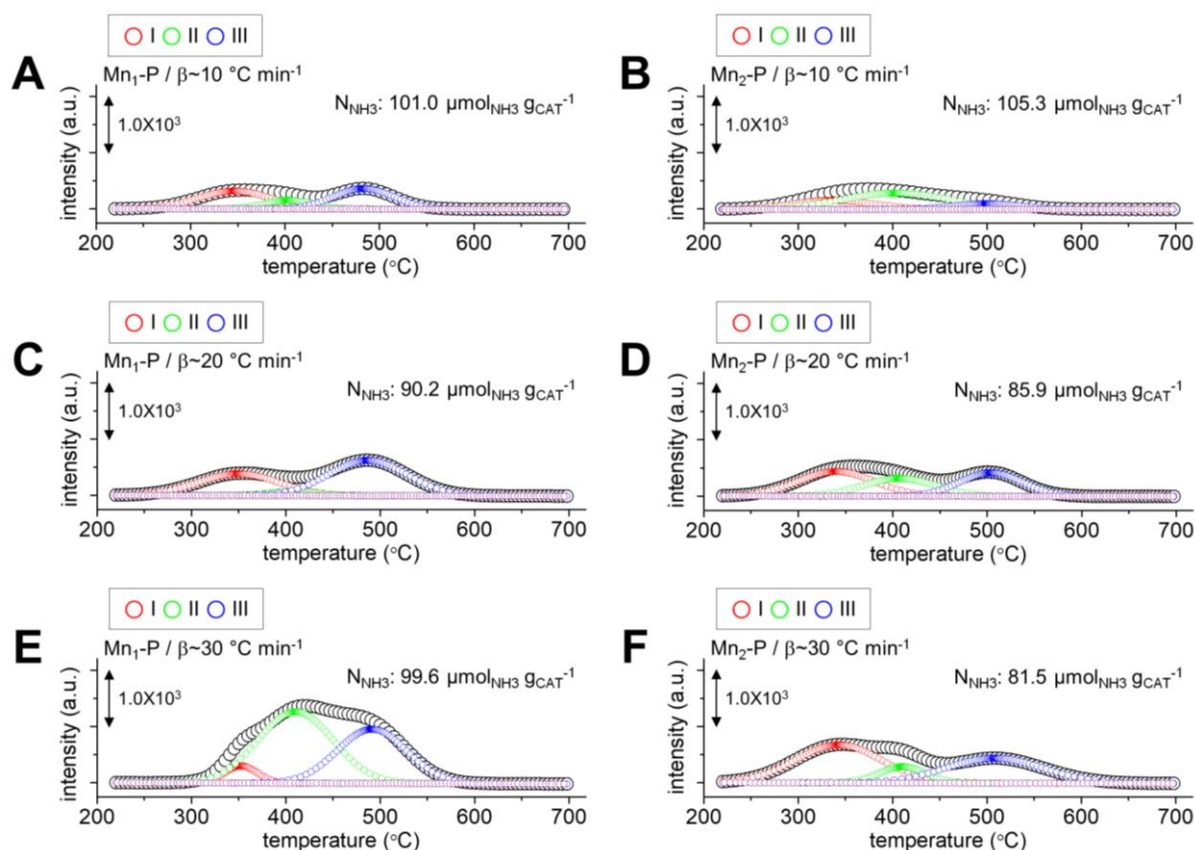

**Fig. S6.** NH<sub>3</sub>-TPD profiles (TCD signal *versus* temperature) of Mn<sub>1</sub>-P (A, C, and E) and Mn<sub>2</sub>-P (B, D, and F), whose surfaces chemisorbed NH<sub>3</sub> molecules at 220 °C and were heated to 700 °C with a ramping rate (β) of 10 °C min<sup>-1</sup> (A-B), 20 °C min<sup>-1</sup> (C-D), or 30 °C min<sup>-1</sup> (E-F). In (A-F), N<sub>NH<sub>3</sub></sub> values indicate the amounts of NH<sub>3</sub> chemisorbed in a per-gram of the catalysts at 220 °C. Moreover, in (A-F), NH<sub>3</sub>-TPD profiles (black empty circles) were curved-fitted using Gaussian functions to exhibit backgrounds (wine empty circles), sub-band I (red empty circles), sub-band II (green empty circles), and sub-band III (blue empty circles), where sub-band I-III possessed the temperatures with maximum intensities of TCD signals (T<sub>MAX</sub>). β and T<sub>MAX</sub> values of sub-band I-III are listed in Table S7 and served to plot ln (β/T<sub>MAX</sub><sup>2</sup>) *versus* (1/T<sub>MAX</sub>) for assessing NH<sub>3</sub> binding energies (E<sub>NH<sub>3</sub></sub>) of the catalysts at 220 °C, as shown in Fig. 4A.

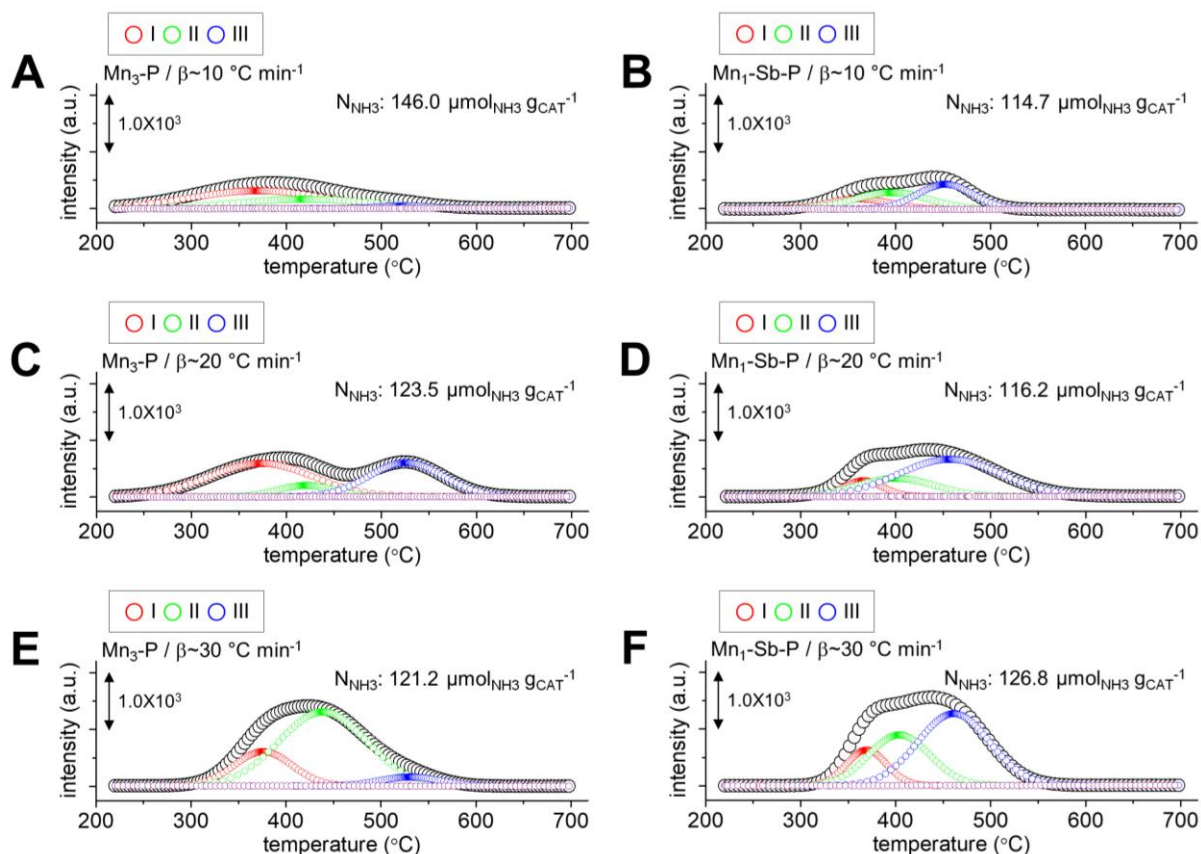

**Fig. S7.**  $\text{NH}_3$ -TPD profiles (TCD signal *versus* temperature) of  $\text{Mn}_3\text{-P}$  (A, C, and E) and  $\text{Mn}_1\text{-Sb-P}$  (B, D, and F), whose surfaces chemisorbed  $\text{NH}_3$  molecules at 220 °C and were heated to 700 °C with a ramping rate ( $\beta$ ) of 10 °C  $\text{min}^{-1}$  (A-B), 20 °C  $\text{min}^{-1}$  (C-D), or 30 °C  $\text{min}^{-1}$  (E-F). In (A-F),  $N_{\text{NH}_3}$  values indicate the amounts of  $\text{NH}_3$  chemisorbed in a per-gram of the catalysts at 220 °C. Moreover, in (A-F),  $\text{NH}_3$ -TPD profiles (black empty circles) were curved-fitted using Gaussian functions to exhibit backgrounds (wine empty circles), sub-band I (red empty circles), sub-band II (green empty circles), and sub-band III (blue empty circles), where sub-band I-III possessed the temperatures with maximum intensities of TCD signals ( $T_{\text{MAX}}$ ).  $\beta$  and  $T_{\text{MAX}}$  values of sub-band I-III are listed in Table S7 and served to plot  $\ln(\beta/T_{\text{MAX}}^2)$  *versus*  $(1/T_{\text{MAX}})$  for assessing  $\text{NH}_3$  binding energies ( $E_{\text{NH}_3}$ ) of the catalysts at 220 °C, as shown in Fig. 4A.

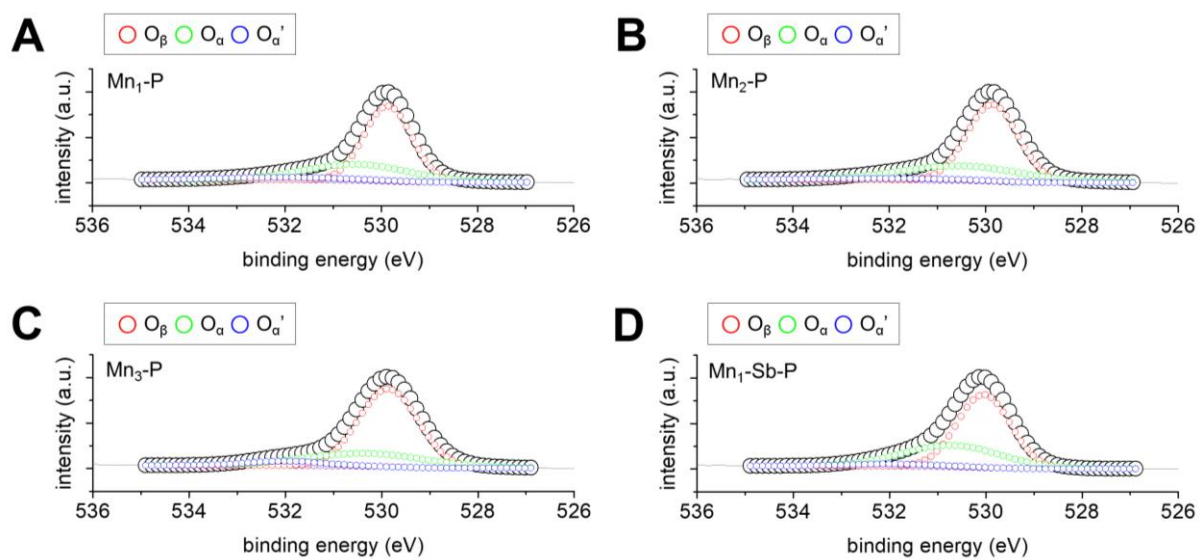

**Fig. S8.** XP spectra of the catalysts in the O 1s regimes ( $\text{Mn}_1\text{-P}$  for (A);  $\text{Mn}_2\text{-P}$  for (B);  $\text{Mn}_3\text{-P}$  for (C);  $\text{Mn}_1\text{-Sb-P}$  for (D)). In (A-D), gray solid lines and black empty circles correspond to the raw spectra and those fitted using Gaussian functions, respectively, whereas red/green/blue empty circles indicate surface  $\text{O}_\beta/\text{O}_\alpha/\text{O}_{\alpha'}$  species with their relative abundance being detailed in Table S5.



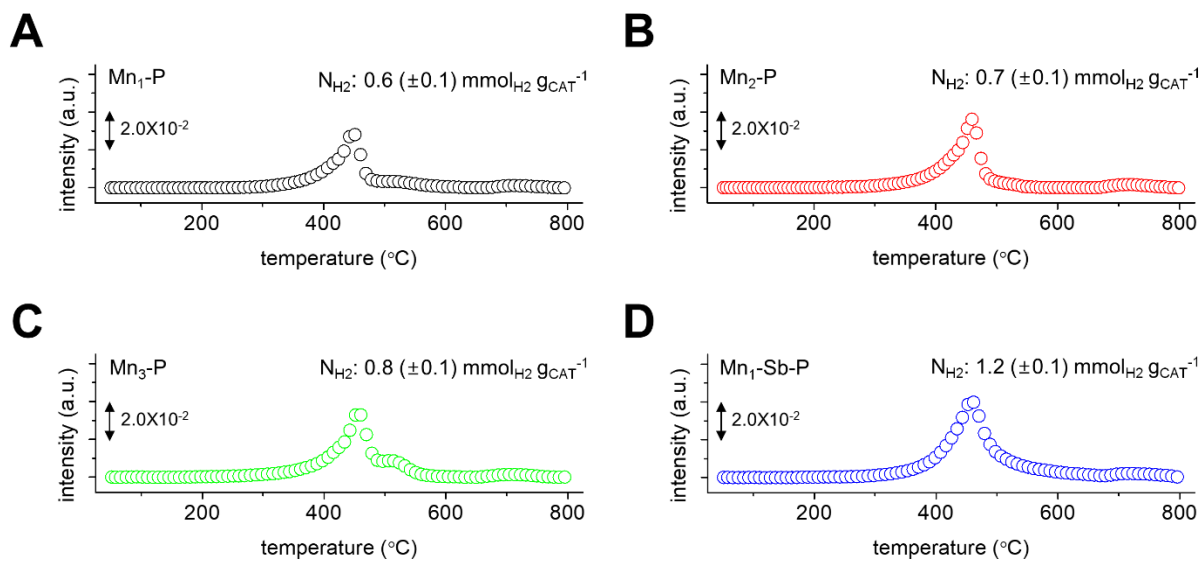

**Fig. S9.** H<sub>2</sub>-TPR profiles (TCD signal *versus* temperature) of the catalysts (Mn<sub>1</sub>-P for (A); Mn<sub>2</sub>-P for (B); Mn<sub>3</sub>-P for (C); Mn<sub>1</sub>-Sb-P for (D)), whose surfaces were subjected to H<sub>2</sub> reduction at 50-800 °C with a ramping rate of 10 °C min<sup>-1</sup>. In (A-D), N<sub>H<sub>2</sub></sub> values indicates the amounts of H<sub>2</sub> needed to reduce the components of the catalysts in use for activating the acidic/redox cycles of the SCR in a per-gram basis.

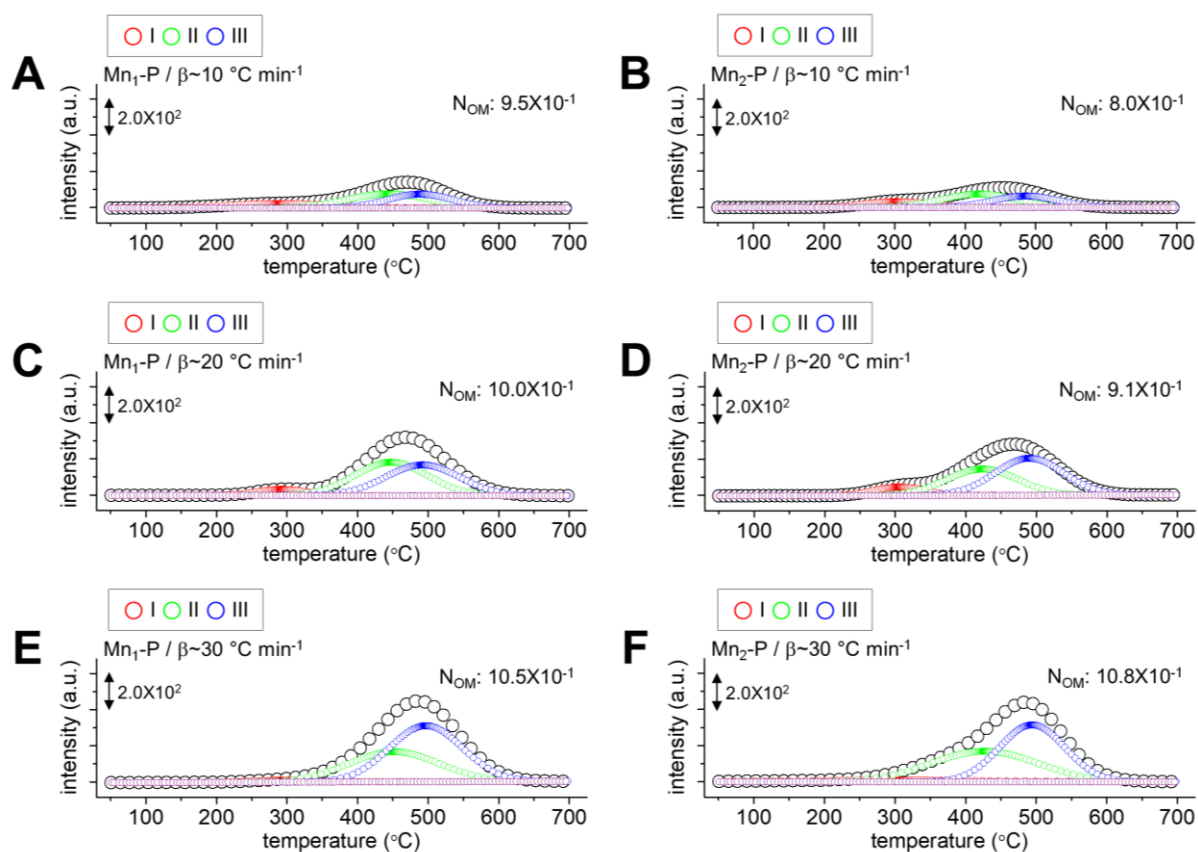

**Fig. S10.** O<sub>2</sub>-TPD profiles (TCD signal *versus* temperature) of Mn<sub>1</sub>-P (A, C, and E) and Mn<sub>2</sub>-P (B, D, and F), whose surfaces were subjected to H<sub>2</sub> reduction at 300 °C with a ramping rate (β) of 10 °C min<sup>-1</sup> for vacating their O<sub>v</sub> sites accessible to O<sub>M</sub> species at low temperatures, coordinate O<sub>M</sub> (1/2O<sub>2</sub>) species to O<sub>v</sub> sites at 50 °C, and were heated to 700 °C with β value of 10 °C min<sup>-1</sup> (A-B), 20 °C min<sup>-1</sup> (C-D), or 30 °C min<sup>-1</sup> (E-F). In (A-F), N<sub>OM</sub> values denote the amounts of O<sub>M</sub> (1/2O<sub>2</sub>) species chemisorbed on O<sub>v</sub> sites in a per-gram of the catalysts with N<sub>OM</sub> value of Mn<sub>1</sub>-P being set as 1.0 at 50 °C. Moreover, in (A-F), O<sub>2</sub>-TPD profiles (black empty circles) were curved-fitted using Gaussian functions to exhibit backgrounds (wine empty circles), sub-band I (red empty circles), sub-band II (green empty circles), and sub-band III (blue empty circles), where sub-band I-III possessed the temperatures with maximum intensities of TCD signals (T<sub>MAX</sub>). β and T<sub>MAX</sub> values of sub-band I-III are listed in Table S9 and served to plot ln (β/T<sub>MAX</sub><sup>2</sup>) *versus* (1/T<sub>MAX</sub>) for assessing binding energies between O<sub>M</sub> species and O<sub>v</sub> sites (E<sub>OM</sub>) for the catalysts at 50 °C, as shown in Fig. 6A.

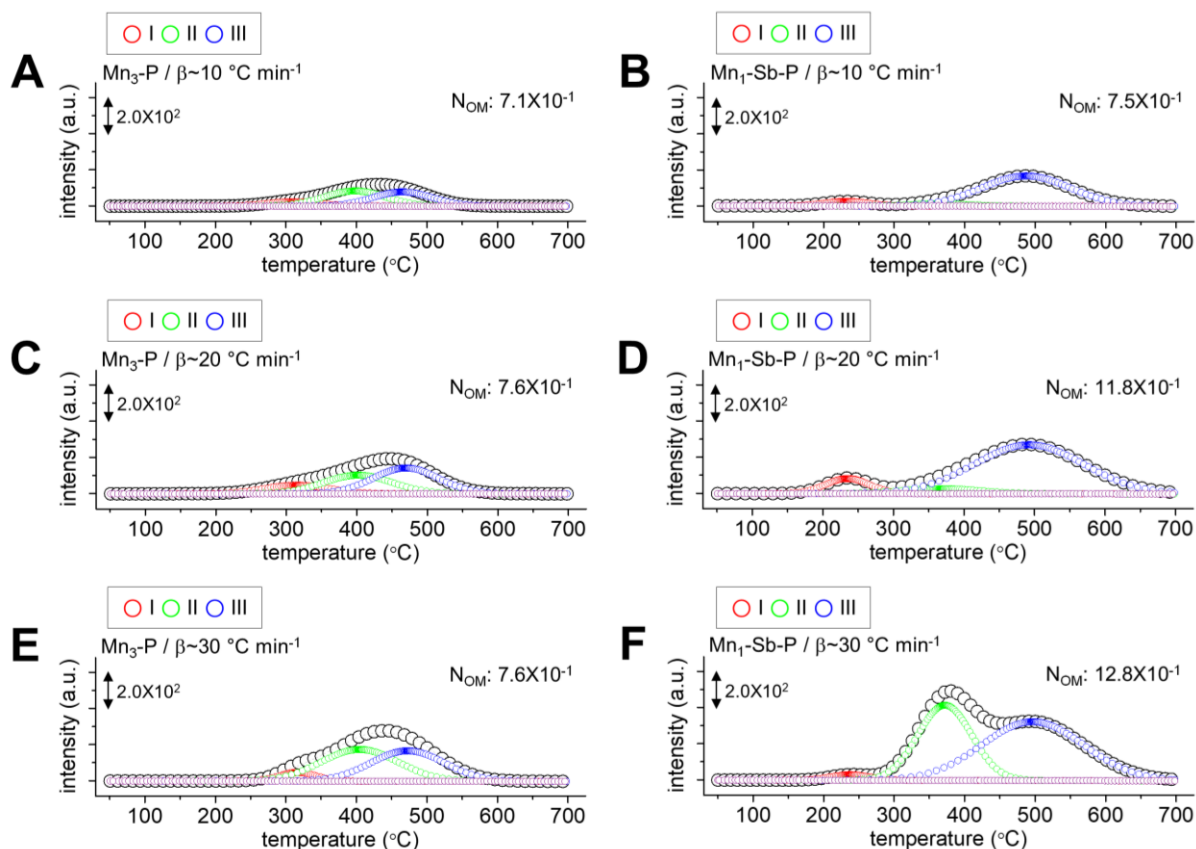

**Fig. S11.** O<sub>2</sub>-TPD profiles (TCD signal *versus* temperature) of Mn<sub>3</sub>-P (A, C, and E) and Mn<sub>1</sub>-Sb-P (B, D, and F), whose surfaces were subjected to H<sub>2</sub> reduction at 300 °C with a ramping rate ( $\beta$ ) of 10 °C min<sup>-1</sup> for vacating their O<sub>v</sub> sites accessible to O<sub>M</sub> species at low temperatures, coordinate O<sub>M</sub> (1/2O<sub>2</sub>) species to O<sub>v</sub> sites at 50 °C, and were heated to 700 °C with  $\beta$  value of 10 °C min<sup>-1</sup> (A-B), 20 °C min<sup>-1</sup> (C-D), or 30 °C min<sup>-1</sup> (E-F). In (A-F), N<sub>OM</sub> values denote the amounts of O<sub>M</sub> (1/2O<sub>2</sub>) species chemisorbed on O<sub>v</sub> sites in a per-gram of the catalysts with N<sub>OM</sub> value of Mn<sub>1</sub>-P being set as 1.0 at 50 °C. Moreover, in (A-F), O<sub>2</sub>-TPD profiles (black empty circles) were curved-fitted using Gaussian functions to exhibit backgrounds (wine empty circles), sub-band I (red empty circles), sub-band II (green empty circles), and sub-band III (blue empty circles), where sub-band I-III possessed the temperatures with maximum intensities of TCD signals (T<sub>MAX</sub>).  $\beta$  and T<sub>MAX</sub> values of sub-band I-III are listed in Table S9 and served to plot  $\ln(\beta/T_{MAX}^2)$  *versus* (1/T<sub>MAX</sub>) for assessing binding energies between O<sub>M</sub> species and O<sub>v</sub> sites (E<sub>OM</sub>) for the catalysts at 50 °C, as shown in Fig. 6A.

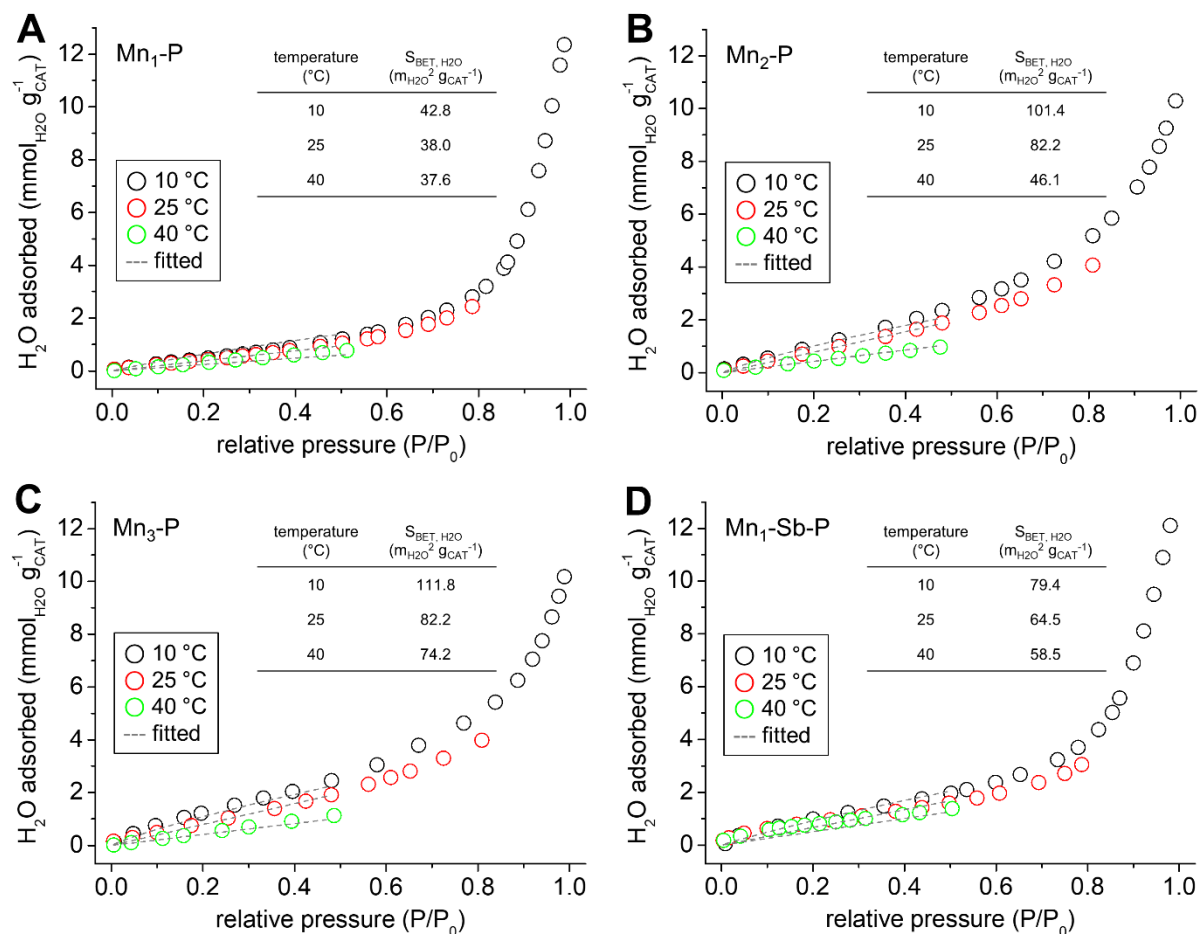

**Fig. S12.** H<sub>2</sub>O adsorption isotherms of the catalysts (Mn<sub>1</sub>-P for (A); Mn<sub>2</sub>-P for (B); Mn<sub>3</sub>-P for (C); Mn<sub>1</sub>-Sb-P for (D)) recorded at 10 °C (black empty circles), 25 °C (red empty circles), and 40 °C (green empty circles). H<sub>2</sub>O adsorption isotherms of the catalysts were simulated using Toth fitting (gray dashed lines), whose coefficients are specified in Table S10, whereas H<sub>2</sub>O-accessible BET surface areas ( $S_{\text{BET}, \text{H}_2\text{O}}$ ) of the catalysts at 10-40 °C are listed in inset tables.

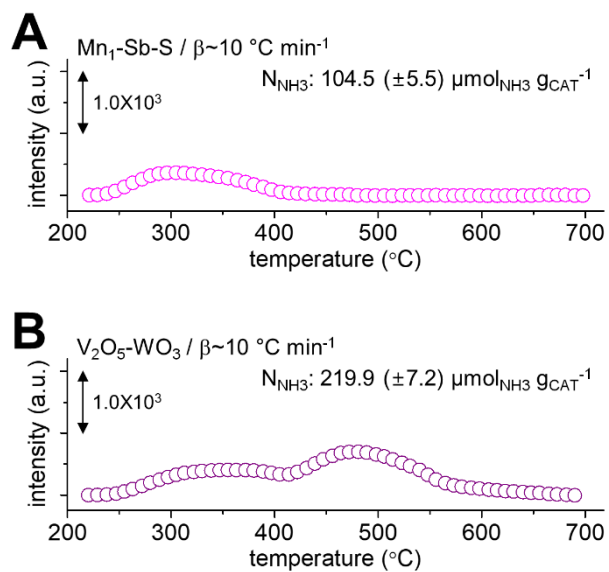

**Fig. S13.**  $\text{NH}_3$ -TPD profiles (TCD signal *versus* temperature) of  $\text{Mn}_1\text{-Sb-S}$  (A) and  $\text{V}_2\text{O}_5\text{-WO}_3$  (B), whose surfaces chemisorbed  $\text{NH}_3$  molecules at  $220 \text{ }^\circ\text{C}$  and were heated to  $700 \text{ }^\circ\text{C}$  with a ramping rate ( $\beta$ ) of  $10 \text{ }^\circ\text{C min}^{-1}$ . In (A-B),  $N_{\text{NH}_3}$  values indicate the amounts of  $\text{NH}_3$  chemisorbed in a per-gram of the catalysts at  $220 \text{ }^\circ\text{C}$ .

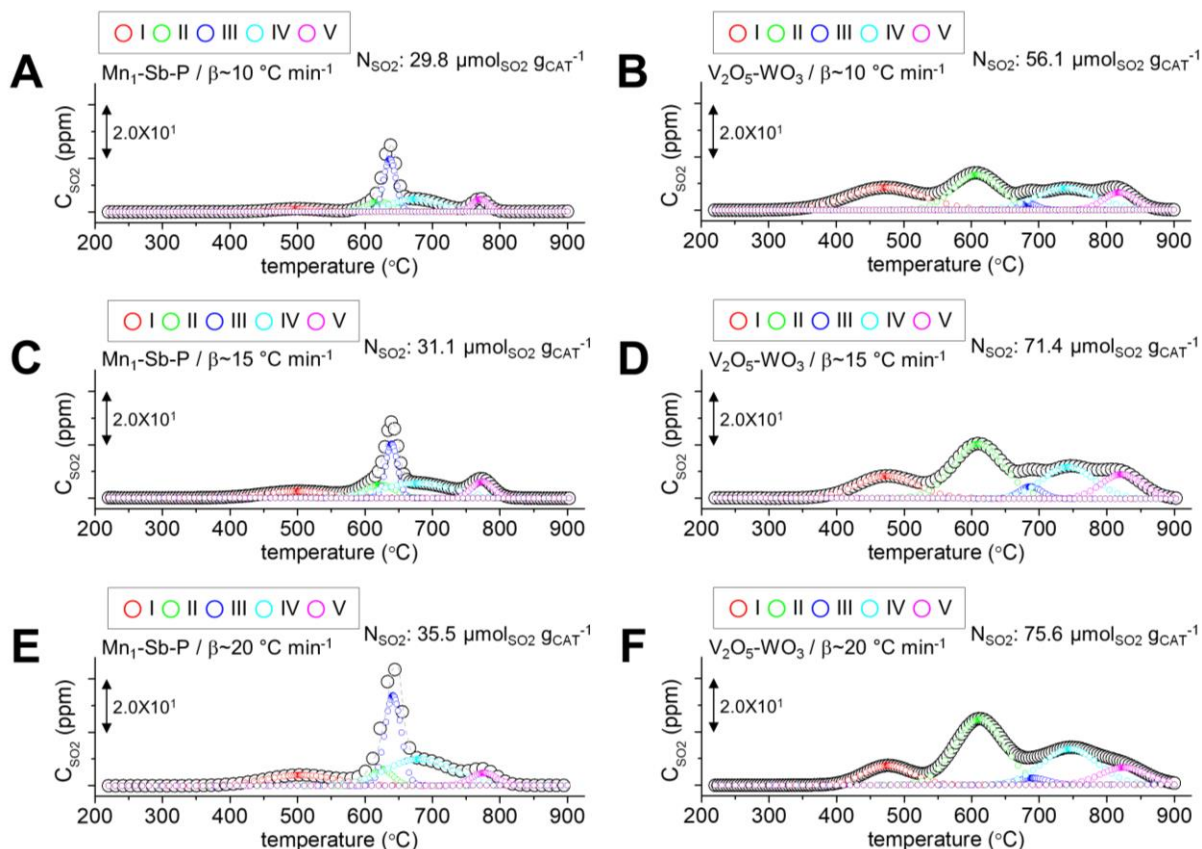

**Fig. S14.** SO<sub>2</sub>-TPD profiles (SO<sub>2</sub> concentration released ( $C_{SO_2}$ ) versus temperature) of Mn<sub>1</sub>-Sb-P (A, C, and E) and V<sub>2</sub>O<sub>5</sub>-WO<sub>3</sub> (B, D, and F), whose surfaces chemisorbed SO<sub>2</sub> molecules at 220 °C and were heated to 900 °C with a ramping rate ( $\beta$ ) of 10 °C min<sup>-1</sup> (A-B), 15 °C min<sup>-1</sup> (C-D), or 20 °C min<sup>-1</sup> (E-F). In (A-F),  $N_{SO_2}$  values indicate the amounts of SO<sub>2</sub> chemisorbed in a per-gram of the catalysts at 220 °C. Moreover, in (A-F), SO<sub>2</sub>-TPD profiles (black empty circles) were curved-fitted using Gaussian functions to exhibit backgrounds (wine empty circles), sub-band I (red empty circles), sub-band II (green empty circles), sub-band III (blue empty circles), sub-band IV (cyan empty circles), and sub-band V (magenta empty circles), where sub-band I-V possessed the temperatures with maximum intensities of  $C_{SO_2}$  values being released ( $T_{MAX}$ ).  $\beta$  and  $T_{MAX}$  values of sub-band I-V are listed in Table S11 and served to plot  $\ln(\beta/T_{MAX}^2)$  versus  $(1/T_{MAX})$  for assessing SO<sub>2</sub> binding energies ( $E_{SO_2}$ ) of the catalysts at 220 °C, as shown in Fig. 8A.

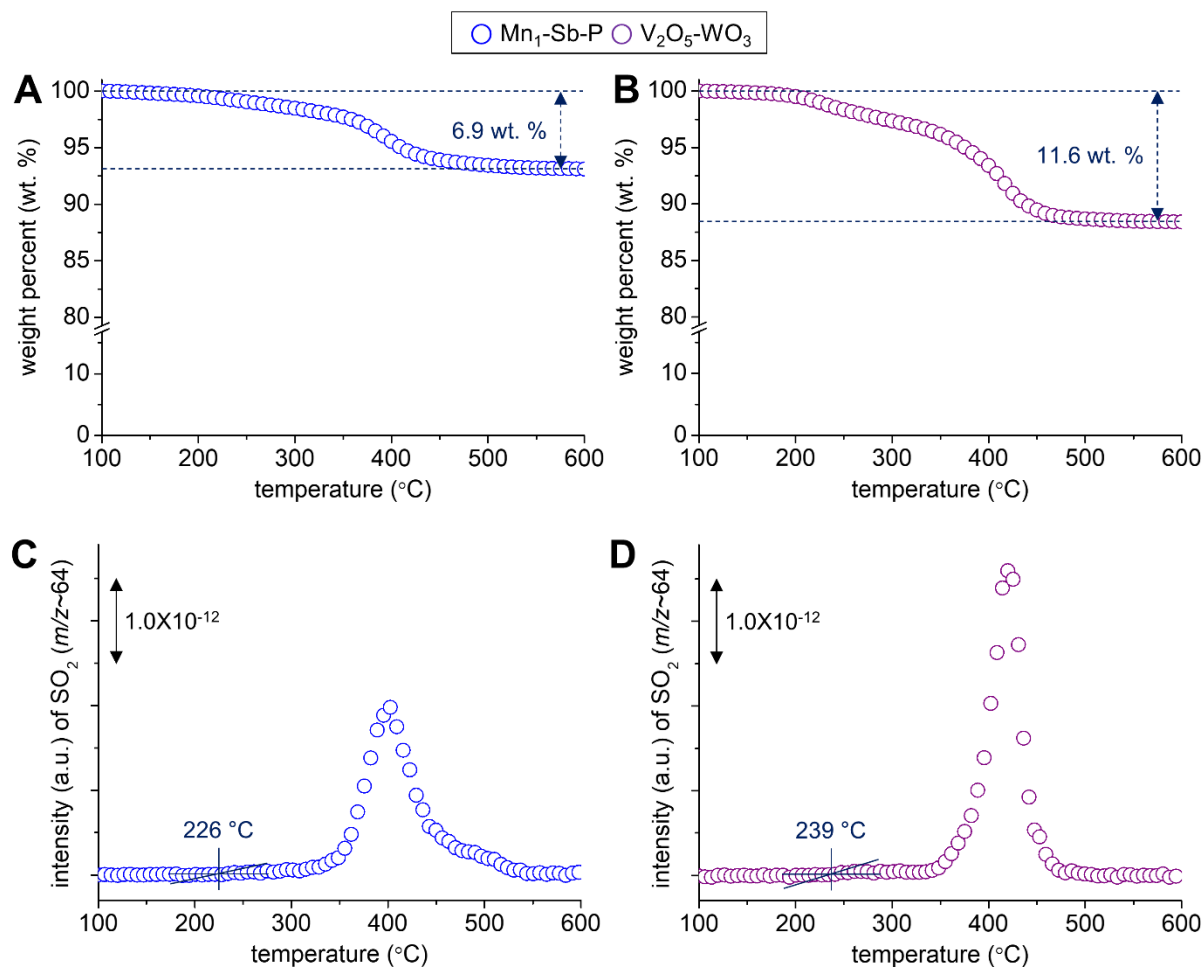

**Fig. S15.** TGA profiles (weight percent *versus* temperature) of AS/ABS-poisoned Mn<sub>1</sub>-Sb-P (A) and V<sub>2</sub>O<sub>5</sub>-WO<sub>3</sub> (B) under an Ar. In (A-B), values shown with arrows correspond to the quantities of AS/ABS pertaining to the poisoned catalysts. Signals of SO<sub>2</sub> released *versus* temperature for AS/ABS-poisoned Mn<sub>1</sub>-Sb-P (C) and V<sub>2</sub>O<sub>5</sub>-WO<sub>3</sub> (D) subjected to pyrolysis under an Ar. In (C-D), temperatures denote the onsets of SO<sub>2</sub> signal evolution. AS/ABS poison environments: 800 ppm NO<sub>x</sub>; 800 ppm NH<sub>3</sub>; 500 ppm SO<sub>2</sub>; 3.0 vol. % O<sub>2</sub>; 5.4 vol. % H<sub>2</sub>O; 180 °C; 30 hours; catalysts sieved with sizes of 300-425 μm; GHSV of 60,000 hr<sup>-1</sup>; total flow rate of 500 mL min<sup>-1</sup>; balanced by a N<sub>2</sub>. AS/ABS pyrolysis environments: total flow rate of 50 mL min<sup>-1</sup>; ramping rate of 5 °C min<sup>-1</sup>; under an Ar.

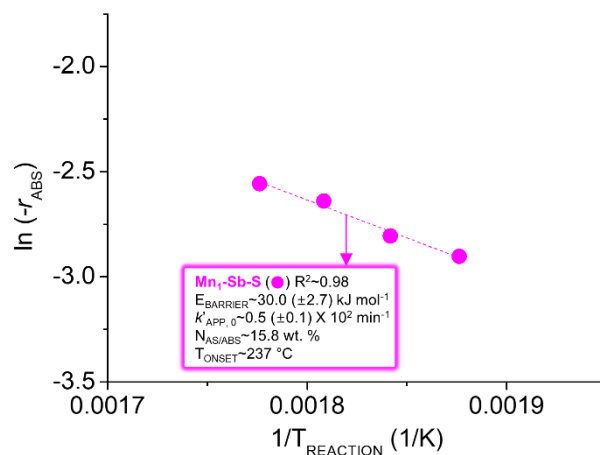

**Fig. S16.** Arrhenius plot ( $\ln(-r_{\text{ABS}})$  versus  $1/T_{\text{REACTION}}$ ) of Mn<sub>1</sub>-Sb-S, where  $-r_{\text{ABS}}$ ,  $T_{\text{REACTION}}$ ,  $R^2$ ,  $E_{\text{BARRIER}}/K'_{\text{APP},0}$  indicate ABS consumption rate, reaction temperature, regression factor, and energy barrier/lumped collision frequency needed to activate ABS pyrolysis on Mn<sub>1</sub>-Sb-S surface, respectively. In addition,  $N_{\text{AS/ABS}}$  and  $T_{\text{ONSET}}$  correspond to the amount (wt. %) of AS/ABS inherent to the poisoned Mn<sub>1</sub>-Sb-S and the onset of SO<sub>2</sub> signal evolution monitored during ABS pyrolysis of the poisoned Mn<sub>1</sub>-Sb-S via TGA-MASS technique, respectively. AS/ABS poison environments: 800 ppm of NO<sub>x</sub>; 800 ppm of NH<sub>3</sub>; 500 ppm of SO<sub>2</sub>; 3.0 vol. % O<sub>2</sub>; 7.7 vol. % H<sub>2</sub>O; 180 °C; 30 hours; catalysts sieved with sizes of 300-425 μm; space velocity of 60,000 hr<sup>-1</sup>; total flow rate of 500 mL min<sup>-1</sup>; balanced by a N<sub>2</sub>. AS/ABS pyrolysis environments: total flow rate of 50 mL min<sup>-1</sup>; ramping rate of 2 °C min<sup>-1</sup>; under an Ar. Dataset is reprinted in part with permission from ref. [2]. Copyright 2022 American Chemical Society.



## References

1. J. Kim, D. H. Kim and H. P. Ha, *J. Hazard. Mater.*, 2020, **397**, 122671.
2. J. Kim, D. H. Kim, J. Park, K. Jeong and H. P. Ha, *ACS Catal.*, 2022, **12**, 2086-2107.
3. S. Lee, J.-H. Lee, H. P. Ha and J. Kim, *Chem. Mater.*, 2022, **34**, 1078-1097.
4. S. Lee, H. P. Ha, J.-H. Lee and J. Kim, *J. Mater. Chem. A*, 2023, **11**, 12062-12079.
5. S. Lee, H. P. Ha, J.-H. Lee and J. Kim, *J. Hazard. Mater.*, 2023, **460**, 132278.
6. S. Lee, J. Choi, H. P. Ha, J.-H. Lee, J. Park and J. Kim, *ACS Catal.*, 2024, **14**, 3349-3368.
7. H. J. An, D. H. Kim, H. P. Ha and J. Kim, *J. Mater. Chem. A*, 2021, **9**, 8350-8371.
8. J. Kim, K. B. Nam and H. P. Ha, *J. Hazard. Mater.*, 2021, **416**, 125780.
9. J. Kim, Y. J. Choe, S. H. Kim, I.-S. Choi and K. Jeong, *JACS Au*, 2021, **1**, 1158-1177.
10. Y. J. Choe, S. H. Kim, K. Jeong and J. Kim, *Chem. Eng. J.*, 2023, **455**, 140537.
11. Y. J. Choe, S. Lee, M. Kim, S. H. Kim, I.-S. Choi, K. Jeong and J. Kim, *Sep. Purif. Technol.*, 2023, **310**, 123146.
12. M. Kim, J. Park, S. H. Kim, J.-H. Lee, K. Jeong and J. Kim, *Carbon*, 2023, **203**, 630-649.
13. M. Kim, M. Al Mamunur Rashid, Y. J. Choe, S. H. Kim, J.-H. Lee, K. Jeong and J. Kim, *J. Mater. Chem. A*, 2023, **11**, 9436-9454.
14. J. Kim, S. Lee and H. P. Ha, *ACS Catal.*, 2021, **11**, 767-786.
